# Supplementary material for: Synthesis of Tryptamine-Thiazolidin-4-one Derivatives and the Combined In Silico and In Vitro Evaluation of their Biological Activity and Cytotoxicity
Source: PubMed Central journal article supplement (PMC11541526; doi:10.1021/acsomega.4c04456), 2024-10-23
Supplement: ao4c04456_si_001.pdf [file ao4c04456_si_001.pdf]

## Supporting Information

# Synthesis of Tryptamine-Thiazolidin-4-one Derivatives and the Combined *in silico* and *in vitro* Evaluation of their Biological Activity and Cytotoxicity

Seher Aydın<sup>a</sup>, Yavuz Ergün<sup>b,\*</sup>, Salma Ghazy<sup>c,d</sup>, Asuman Çelebi<sup>e</sup>, Turker Kilic<sup>f</sup>, Timuçin Avşar<sup>e</sup>, Serdar Durdağı<sup>c,d,g,\*</sup>

<sup>a</sup>Dokuz Eylül University, The Graduate School of Natural and Applied Sciences, Kaynaklar Campus, 35160 Buca, Izmir, Türkiye

<sup>b</sup>Dokuz Eylül University, Faculty of Sciences, Department of Chemistry, Kaynaklar Campus, 35160 Buca, Izmir, Türkiye

<sup>c</sup>Computational Biology and Molecular Simulations Laboratory, Department of Biophysics, School of Medicine, Bahçeşehir University, Istanbul, Türkiye

<sup>d</sup>Lab for Innovative Drugs (Lab4IND), Computational Drug Design Center (HİTMER), Bahçeşehir University, Istanbul, Türkiye

<sup>e</sup>Department of Medical Biology, School of Medicine, Bahcesehir University, Istanbul, Türkiye.

<sup>f</sup>Department of Neurosurgery, School of Medicine, Bahcesehir University, Istanbul, Türkiye.

<sup>g</sup>Molecular Therapy Lab, Department of Pharmaceutical Chemistry, School of Pharmacy, Bahçeşehir University, Istanbul, Türkiye



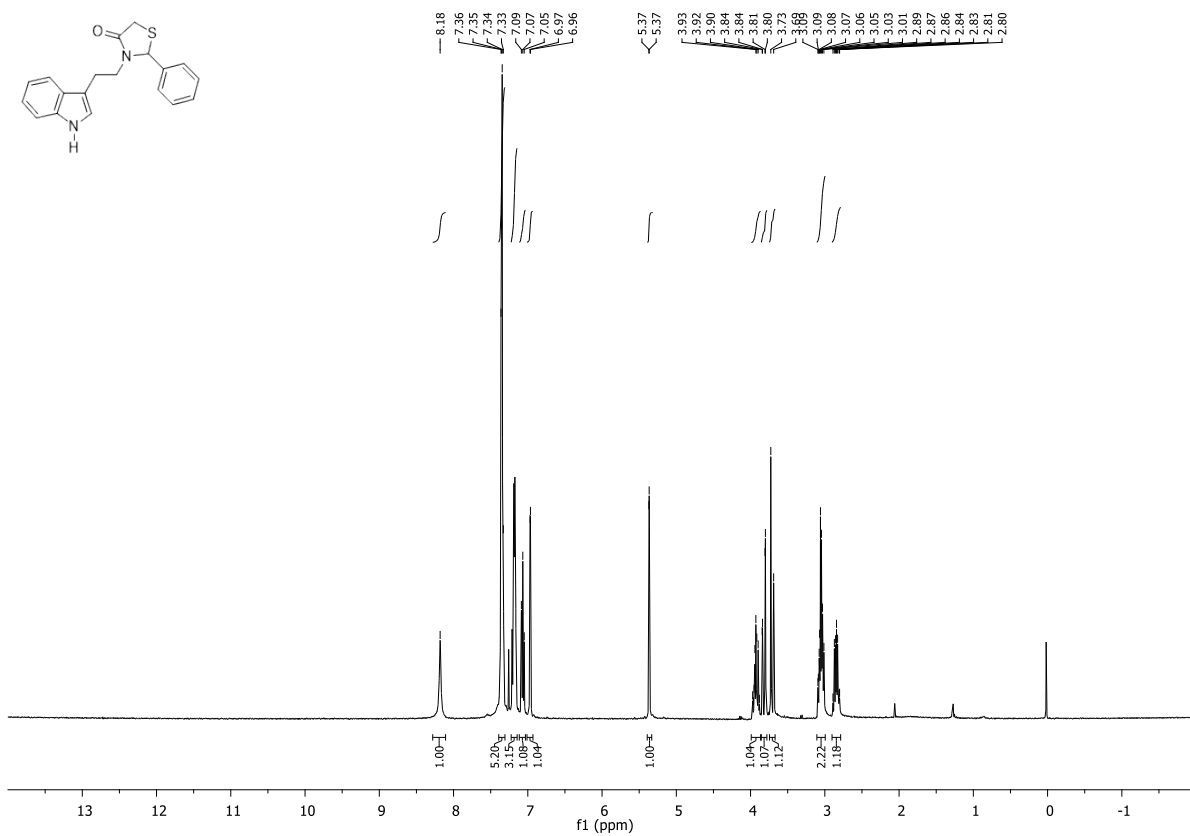

**Figure S2:** <sup>1</sup>H-NMR Spectrum of Compound YS1

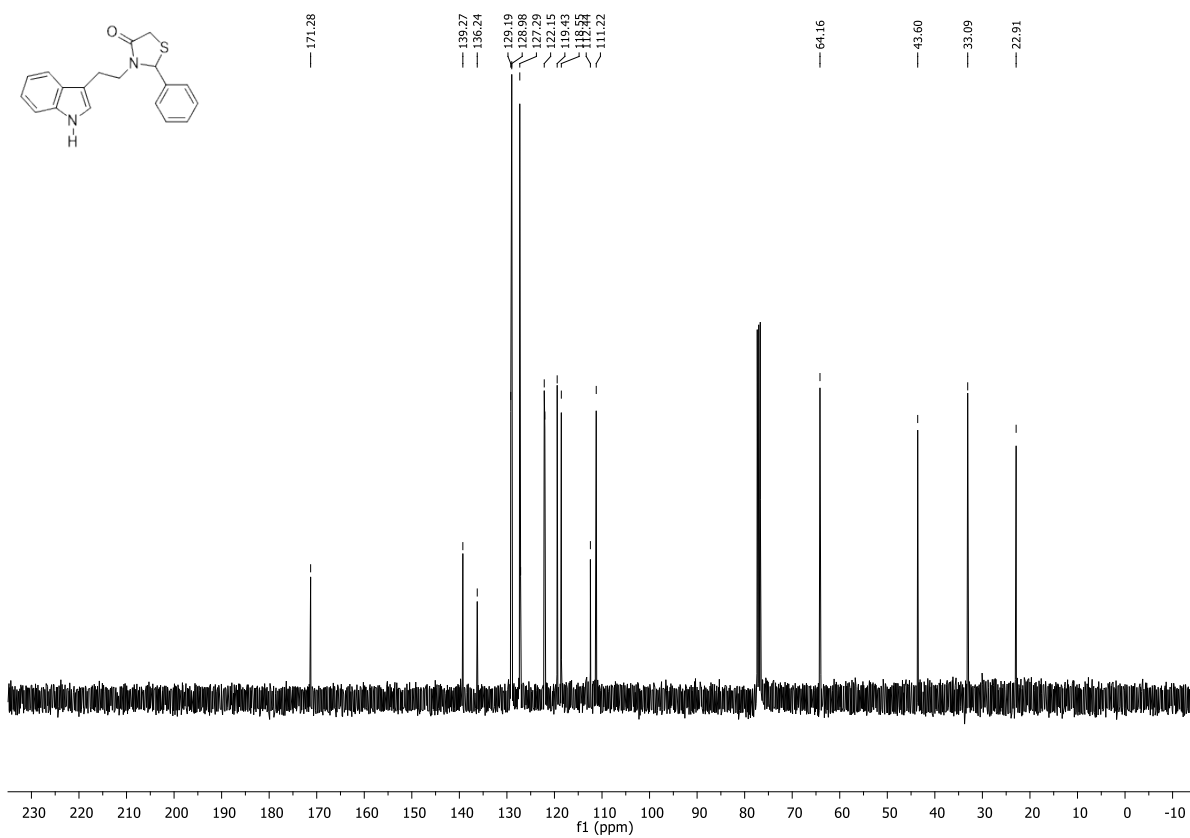

**Figure S3:** <sup>13</sup>C-NMR Spectrum of Compound YS1

## Elemental Composition Report

### Single Mass Analysis

Tolerance = 10000.0 PPM / DBE: min = -5.5, max = 1000.0

Element prediction: Off

Number of isotope peaks used for i-FIT = 9

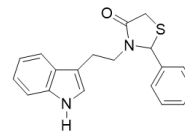

Monoisotopic Mass, Odd and Even Electron Ions  
3 formula(e) evaluated with 1 results within limits (all results (up to 1000) for each mass)  
Elements Used:

C: 19-19 H: 18-19 N: 2-5 O: 1-1 S: 1-1

Seher Aydin

41102\_20230926\_01-01 4 (0.172) Cm (1:5)

1: TOF MS ES+  
1.02e+04

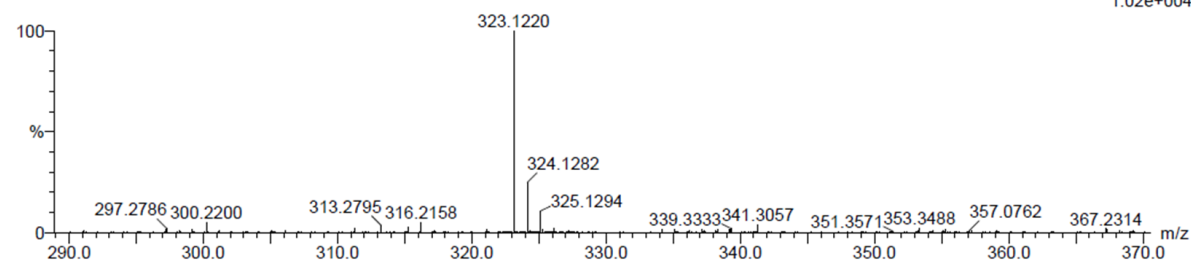

| Mass     | Calc. Mass | mDa | PPM | DBE  | i-FIT | i-FIT (Norm) | Formula        |
|----------|------------|-----|-----|------|-------|--------------|----------------|
| 323.1220 | 323.1218   | 0.2 | 0.6 | 11.5 | 637.1 | 0.0          | C19 H19 N2 O S |

**Figure S4:** HRMS Spectrums of Compound YS1

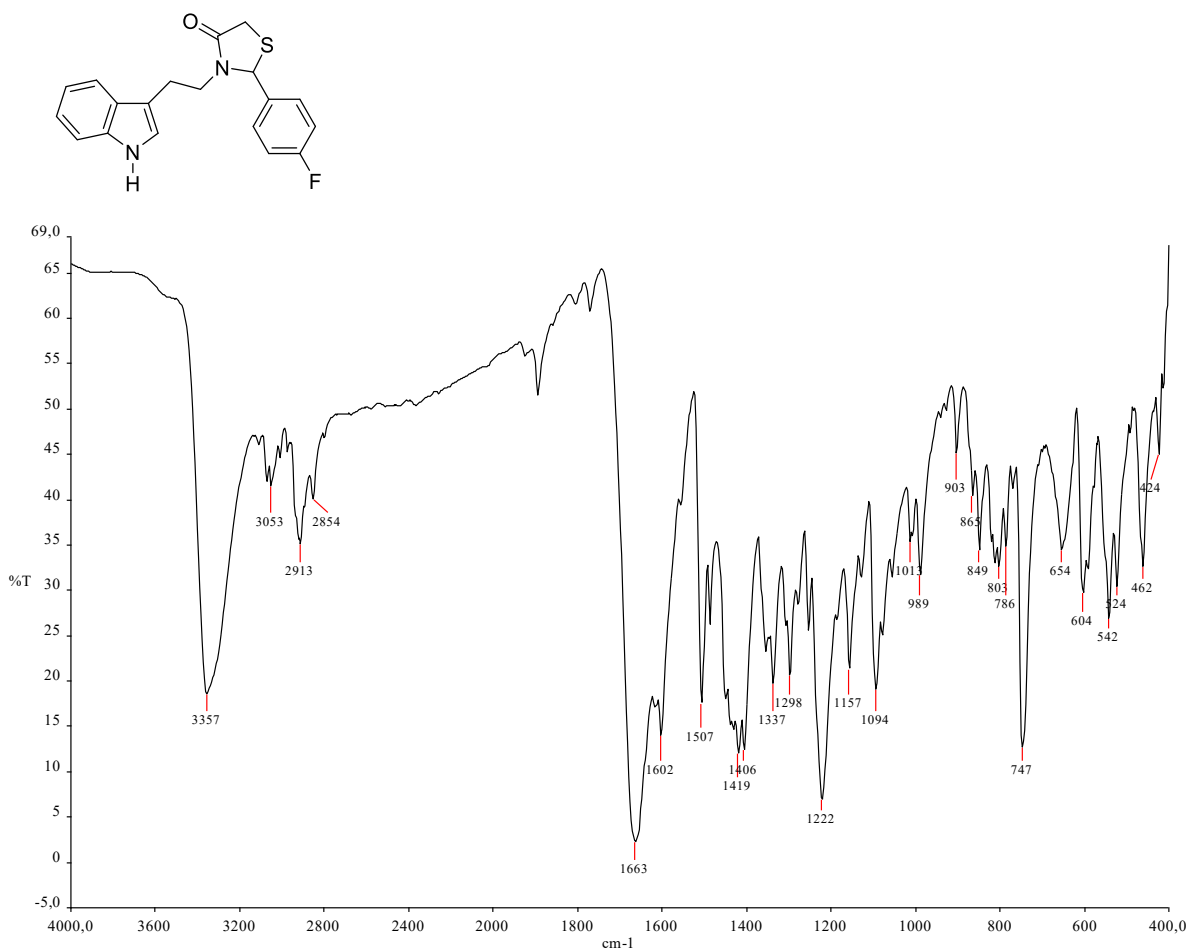

**Figure S5: IR Spectrum of Compound YS2**

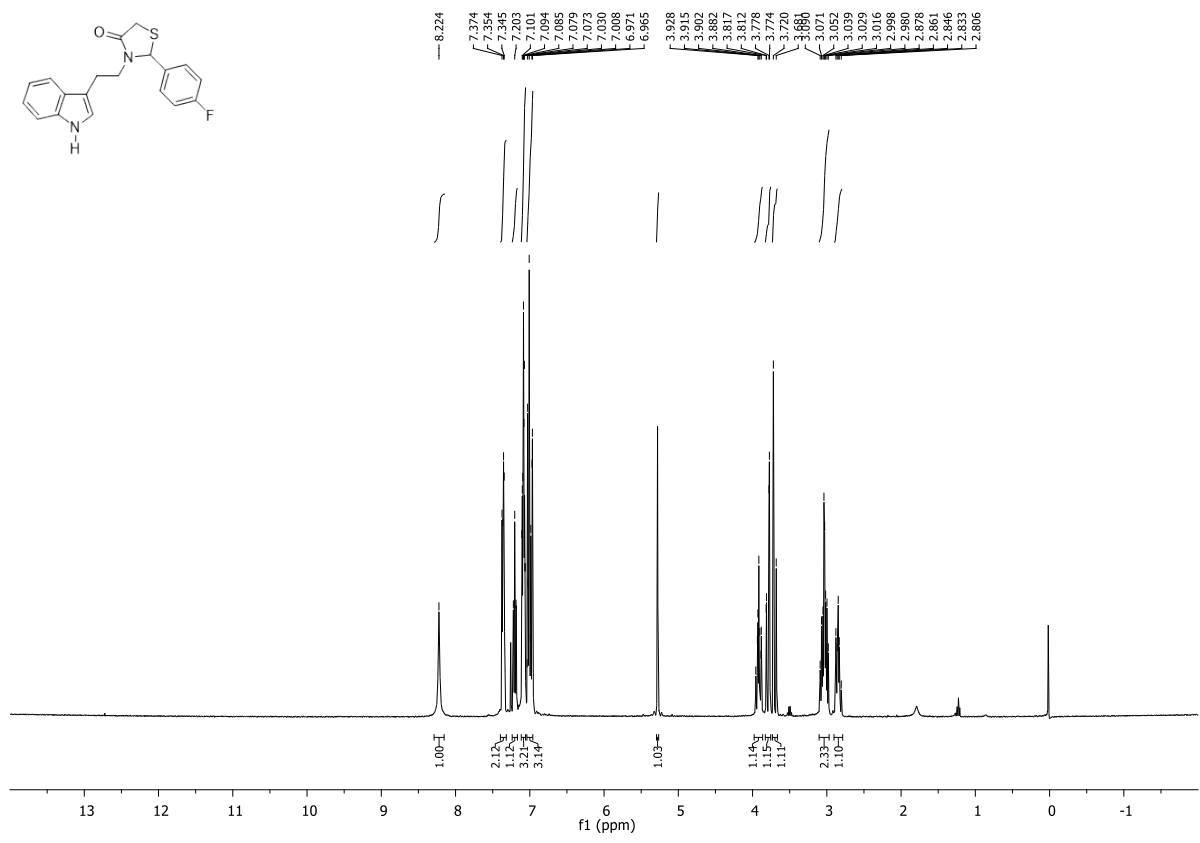

**Figure S6:** <sup>1</sup>H-NMR Spectrum of Compound YS2

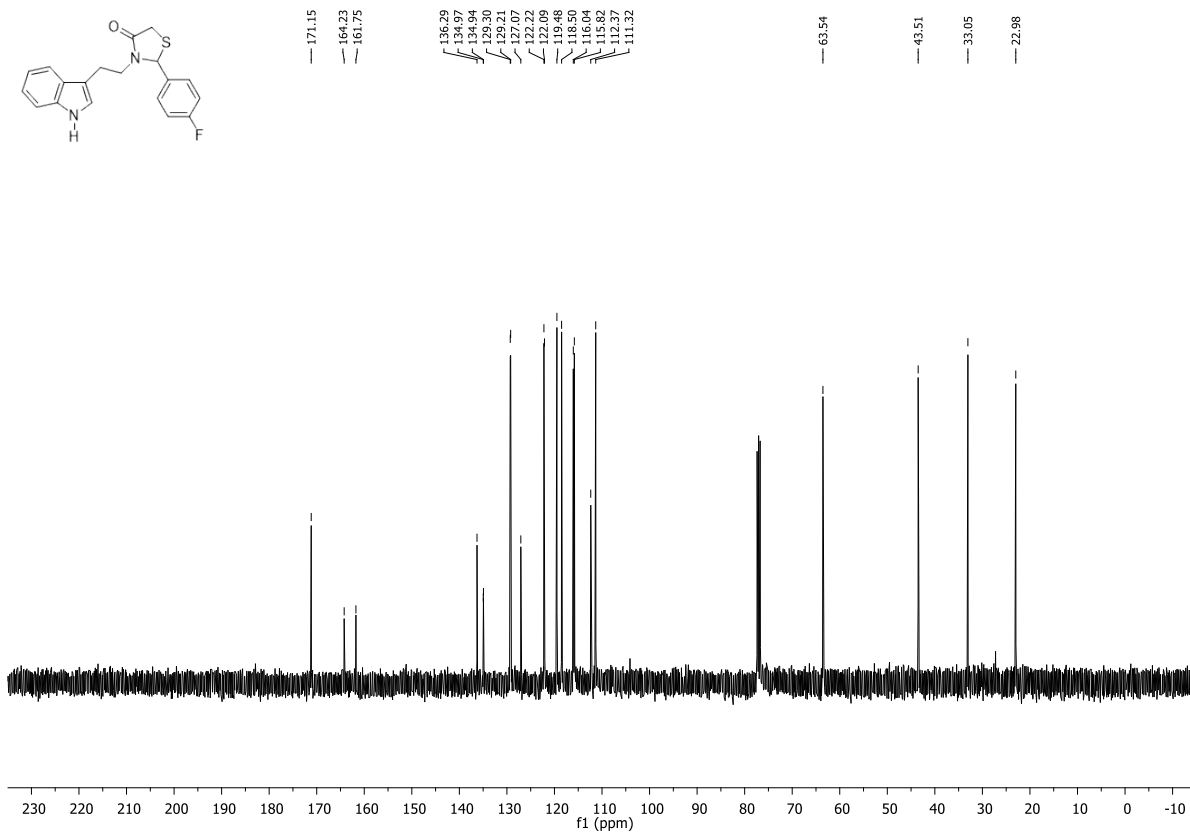

**Figure S7:** <sup>13</sup>C-NMR Spectrum of Compound YS2



## Elemental Composition Report

### Single Mass Analysis

Tolerance = 10000.0 PPM / DBE: min = -5.5, max = 1000.0

Element prediction: Off

Number of isotope peaks used for i-FIT = 9

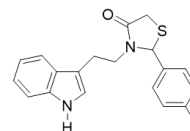

Monoisotopic Mass, Odd and Even Electron Ions

2 formula(e) evaluated with 1 results within limits (all results (up to 1000) for each mass)

Elements Used:

C: 19-19 H: 16-21 N: 2-2 O: 1-2 F: 1-2 S: 1-1

Seher Aydin

41102\_20230928\_02-03 5 (0.206) Cm (5:7)

1: TOF MS ES+  
3.53e+006

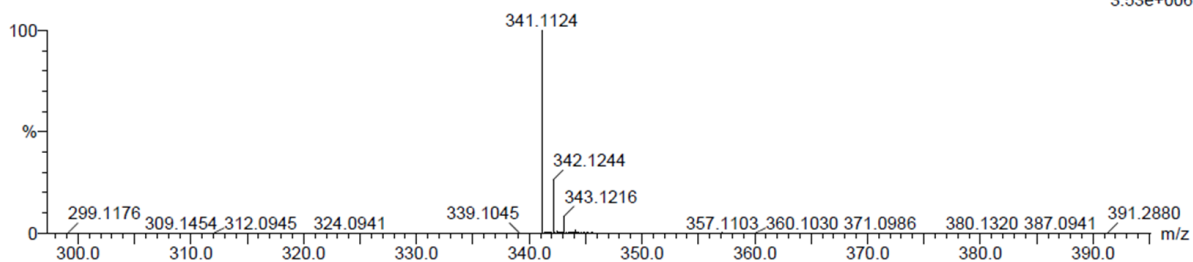

Minimum:

Maximum: 1000.0 10000.0 -5.5 1000.0

| Mass     | Calc. Mass | mDa | PPM | DBE  | i-FIT  | i-FIT (Norm) | Formula          |
|----------|------------|-----|-----|------|--------|--------------|------------------|
| 341.1124 | 341.1124   | 0.0 | 0.0 | 11.5 | 1285.2 | 0.0          | C19 H18 N2 O F S |

**Figure S8:** HRMS Spectrums of Compound YS2

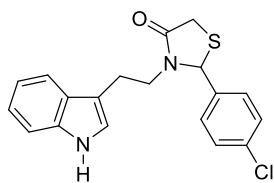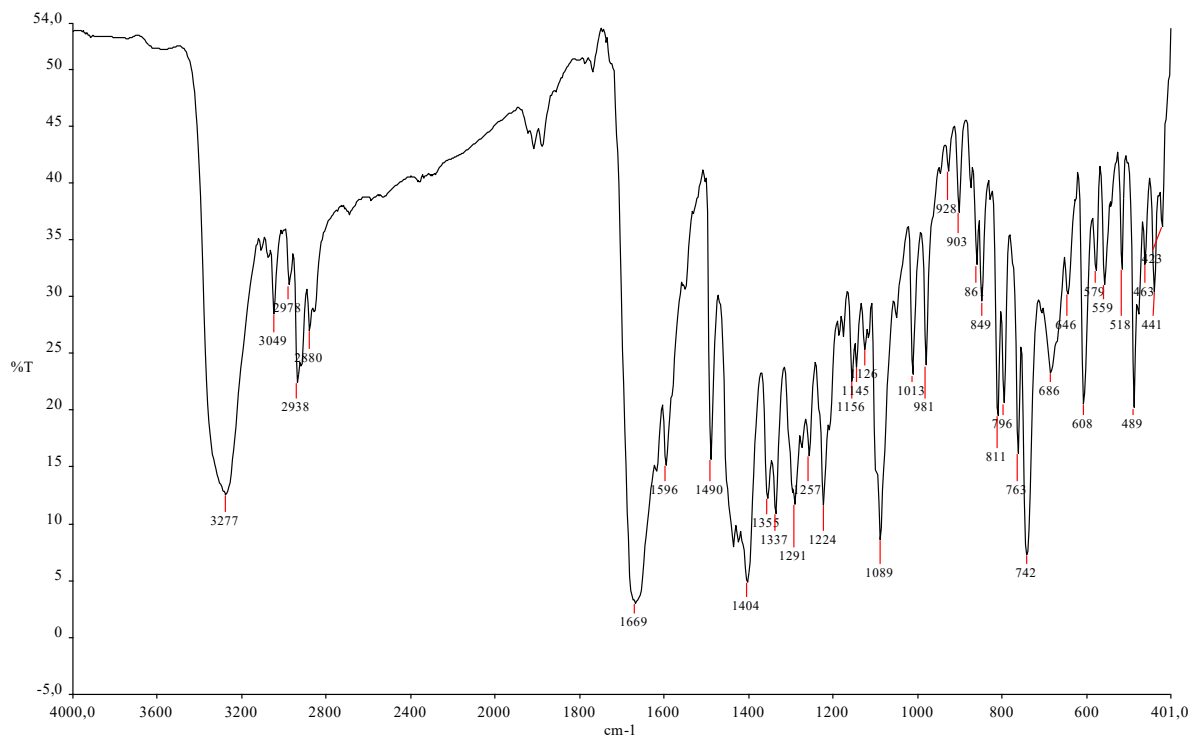

**Figure S9: IR Spectrum of Compound YS3**

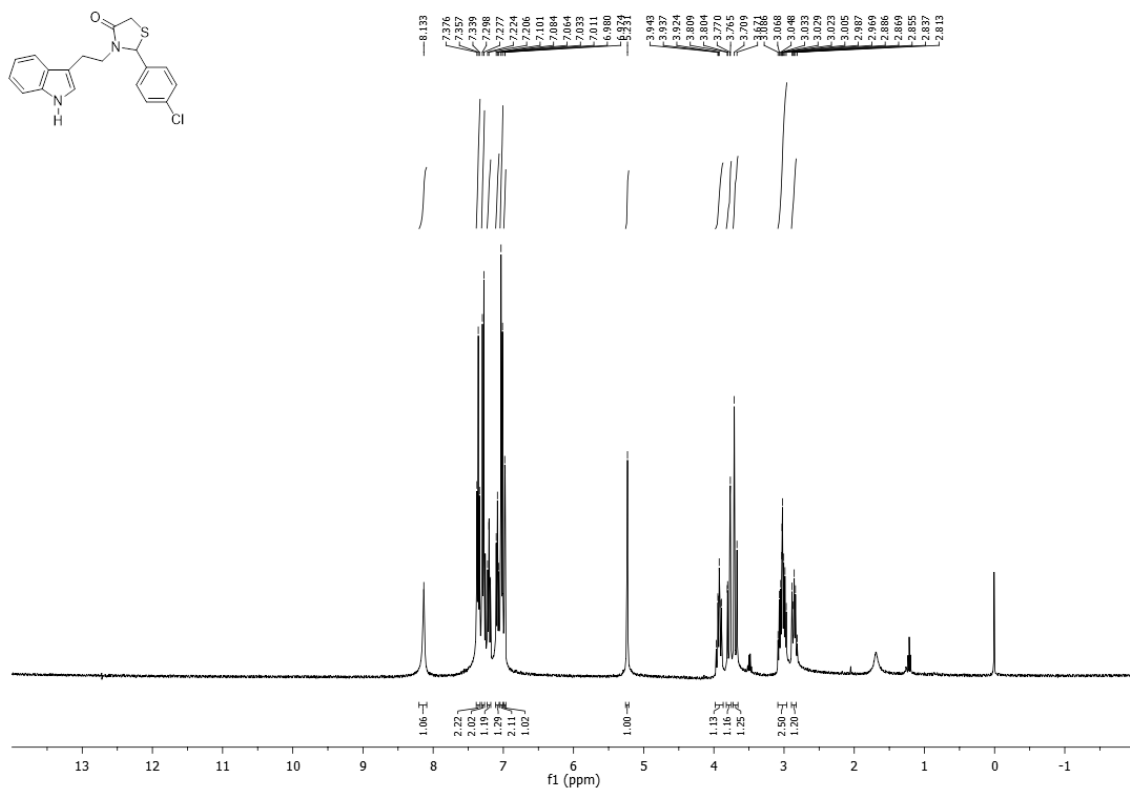

**Figure S10:** <sup>1</sup>H-NMR Spectrum of Compound YS3

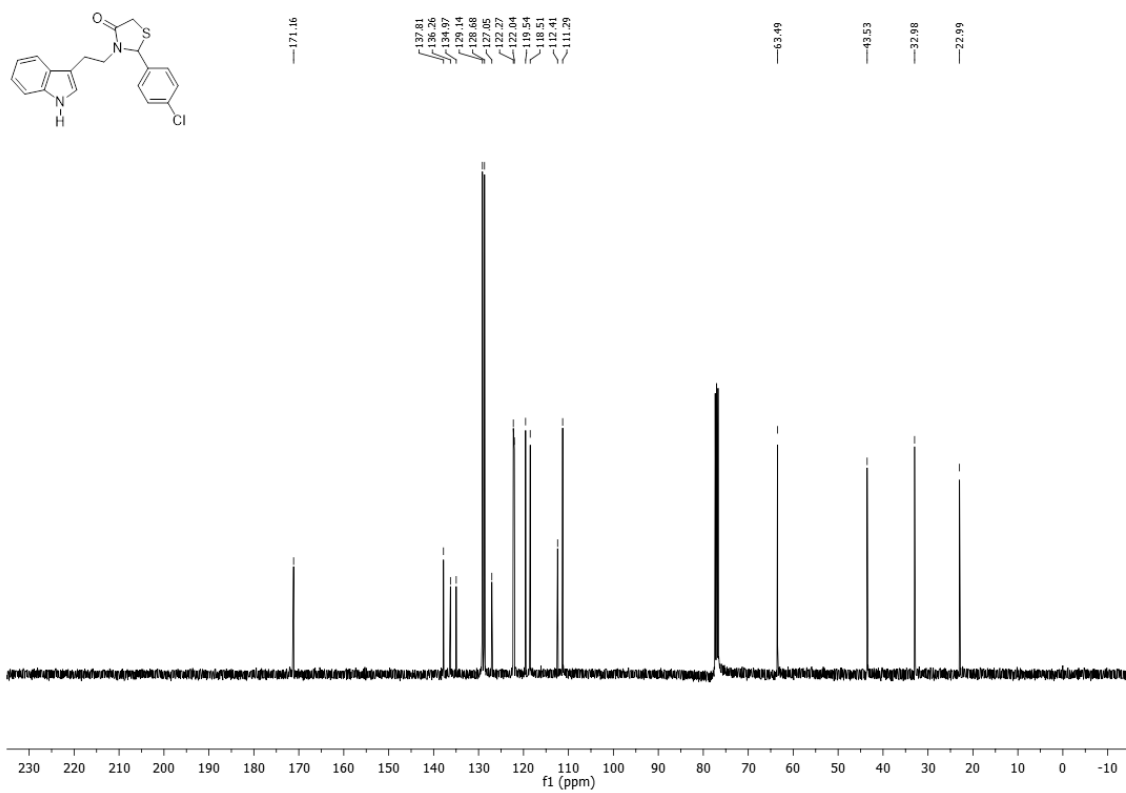

**Figure S11:** <sup>13</sup>C-NMR Spectrum of Compound YS3

## Elemental Composition Report

### Single Mass Analysis

Tolerance = 10000.0 PPM / DBE: min = -5.5, max = 1000.0

Element prediction: Off

Number of isotope peaks used for i-FIT = 9

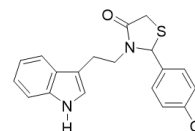

Monoisotopic Mass, Even Electron Ions

8 formula(e) evaluated with 1 results within limits (all results (up to 1000) for each mass)

Elements Used:

C: 19-19 H: 16-21 N: 2-2 O: 1-2 S: 1-1 Cl: 1-3 Na: 0-1

Seher Aydin

41102\_20230928\_03-02 20 (0.775) Cm (18:22)

1: TOF MS ES+  
2.46e+004

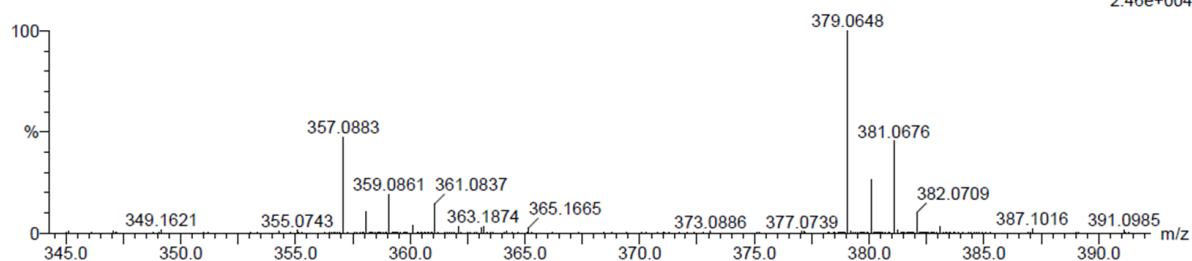

Minimum: -5.5  
Maximum: 1000.0 10000.0 1000.0

| Mass     | Calc. Mass | mDa | PPM | DBE  | i-FIT | i-FIT (Norm) | Formula                                               |
|----------|------------|-----|-----|------|-------|--------------|-------------------------------------------------------|
| 379.0648 | 379.0648   | 0.0 | 0.0 | 11.5 | 783.0 | 0.0          | C <sub>19</sub> H <sub>17</sub> N <sub>2</sub> O S Cl |

**Figure S12:** HRMS Spectrums of Compound YS3

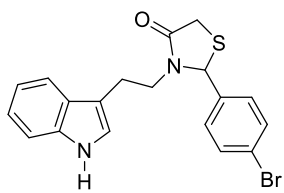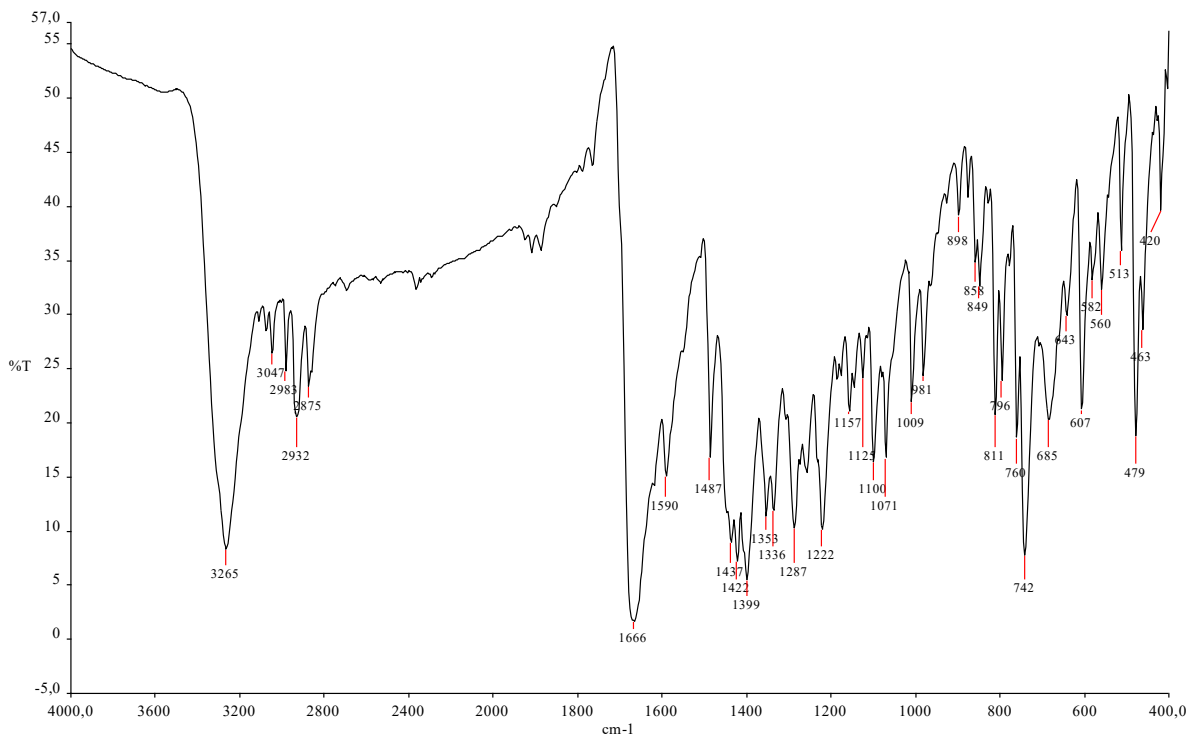

**Figure S13:** IR Spectrum of Compound YS4

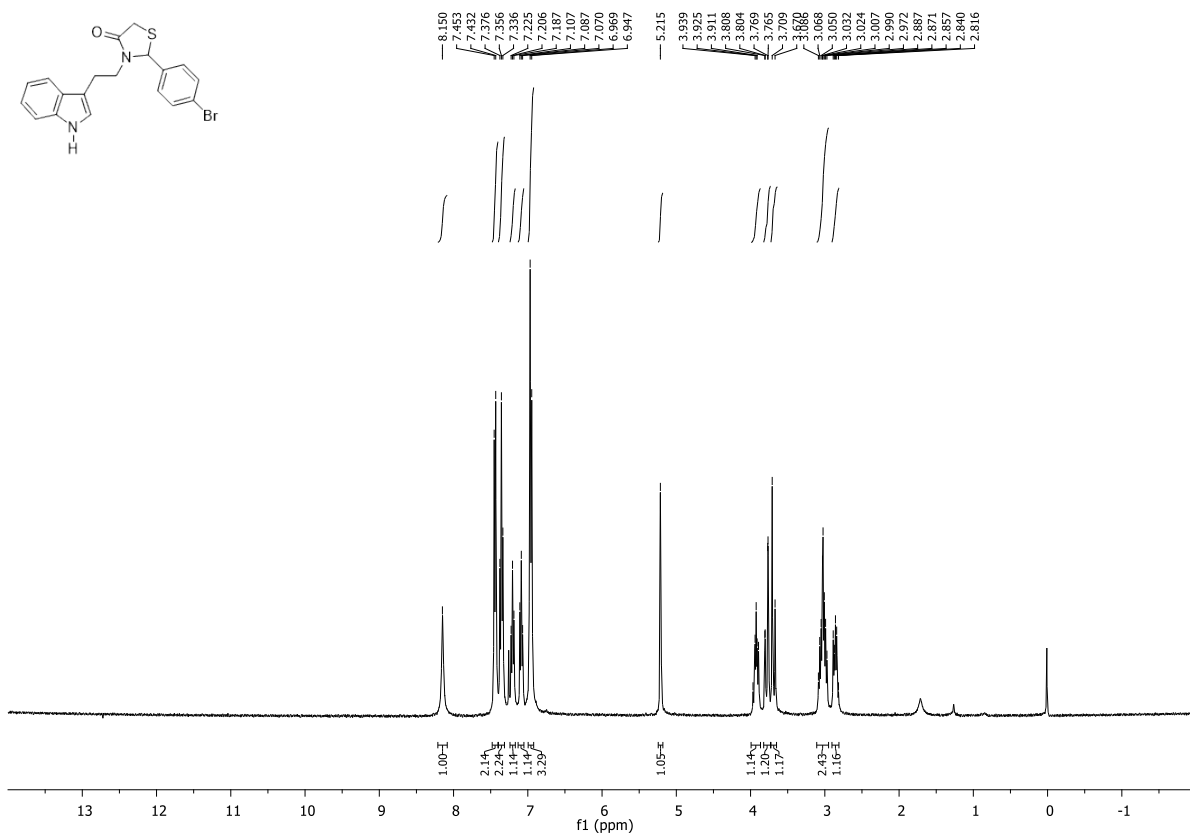

**Figure S14:**  $^1\text{H}$ -NMR Spectrum of Compound YS4

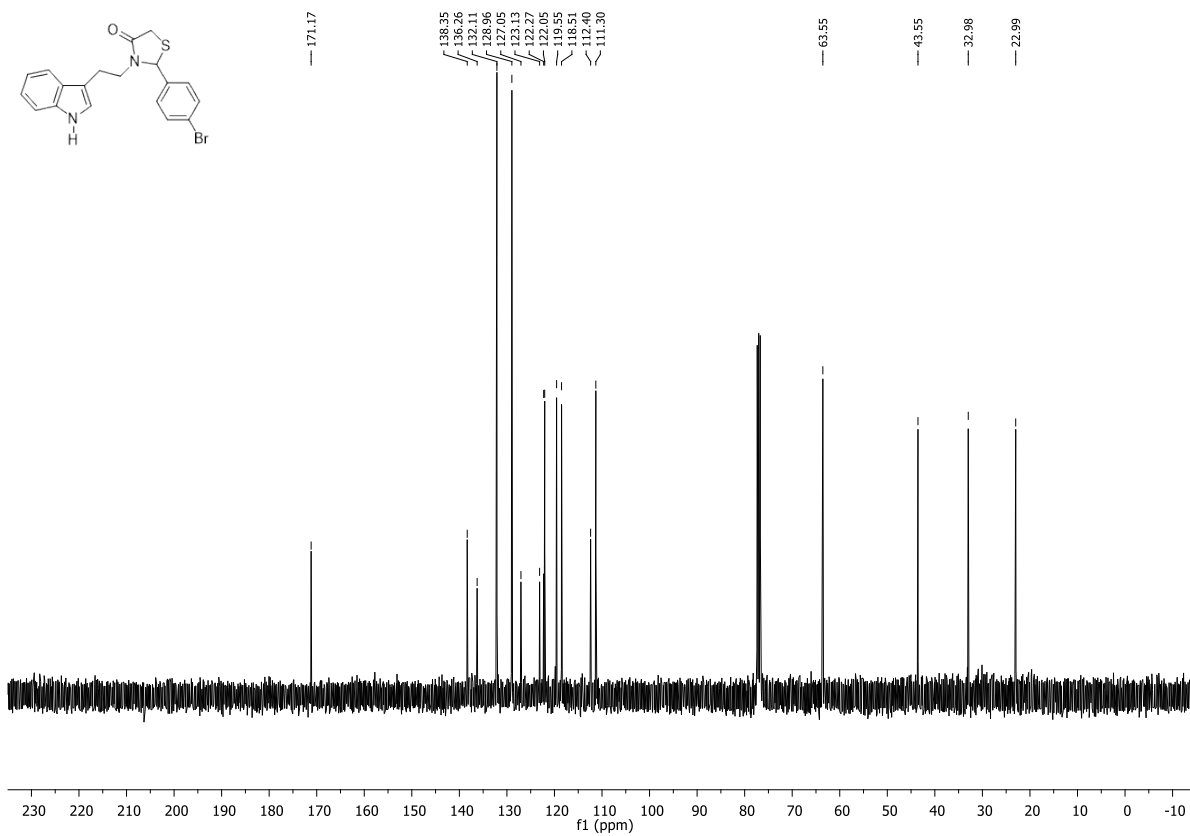

**Figure S15:** <sup>13</sup>C-NMR Spectrum of Compound YS4



## Elemental Composition Report

### Single Mass Analysis

Tolerance = 10000.0 PPM / DBE: min = -5.5, max = 1000.0

Element prediction: Off

Number of isotope peaks used for i-FIT = 9

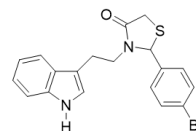

Monoisotopic Mass, Even Electron Ions

14 formula(e) evaluated with 1 results within limits (all results (up to 1000) for each mass)

Elements Used:

C: 19-19 H: 16-17 N: 2-2 O: 1-2 S: 1-1 79Br: 0-2 81Br: 0-2

Seher Aydin

41102\_20230928\_04-N03 1 (0.070) Cm (1:4)

1: TOF MS ES-  
2.76e+004

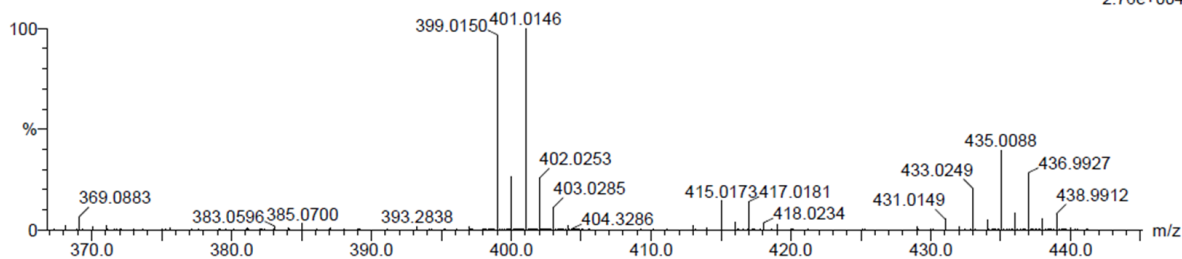

Minimum:

Maximum: 1000.0 10000.0 -5.5 1000.0

| Mass     | Calc. Mass | mDa | PPM | DBE  | i-FIT | i-FIT (Norm) | Formula                |
|----------|------------|-----|-----|------|-------|--------------|------------------------|
| 401.0146 | 401.0146   | 0.0 | 0.0 | 12.5 | 727.7 | 0.0          | C19 H16 N2 O S<br>81Br |

Figure S16: HRMS Spectrums of Compound YS4

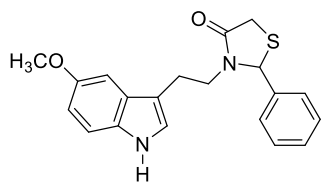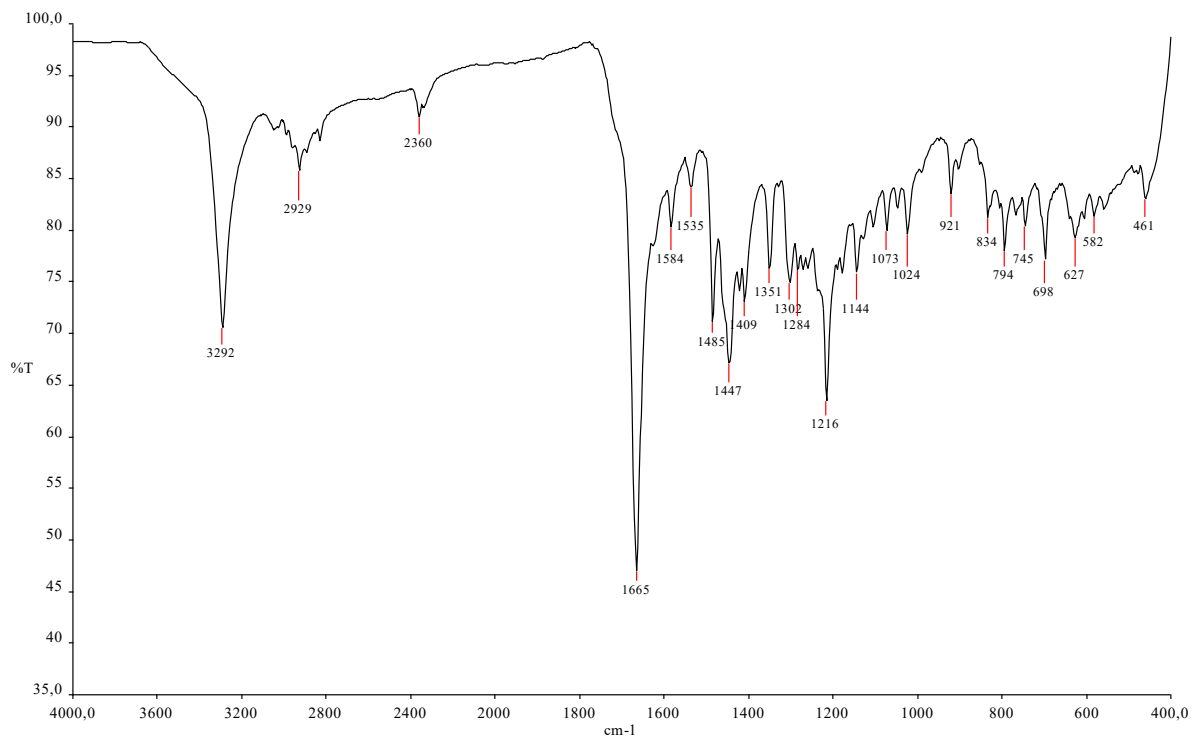

**Figure S17:** IR Spectrum of Compound YS5

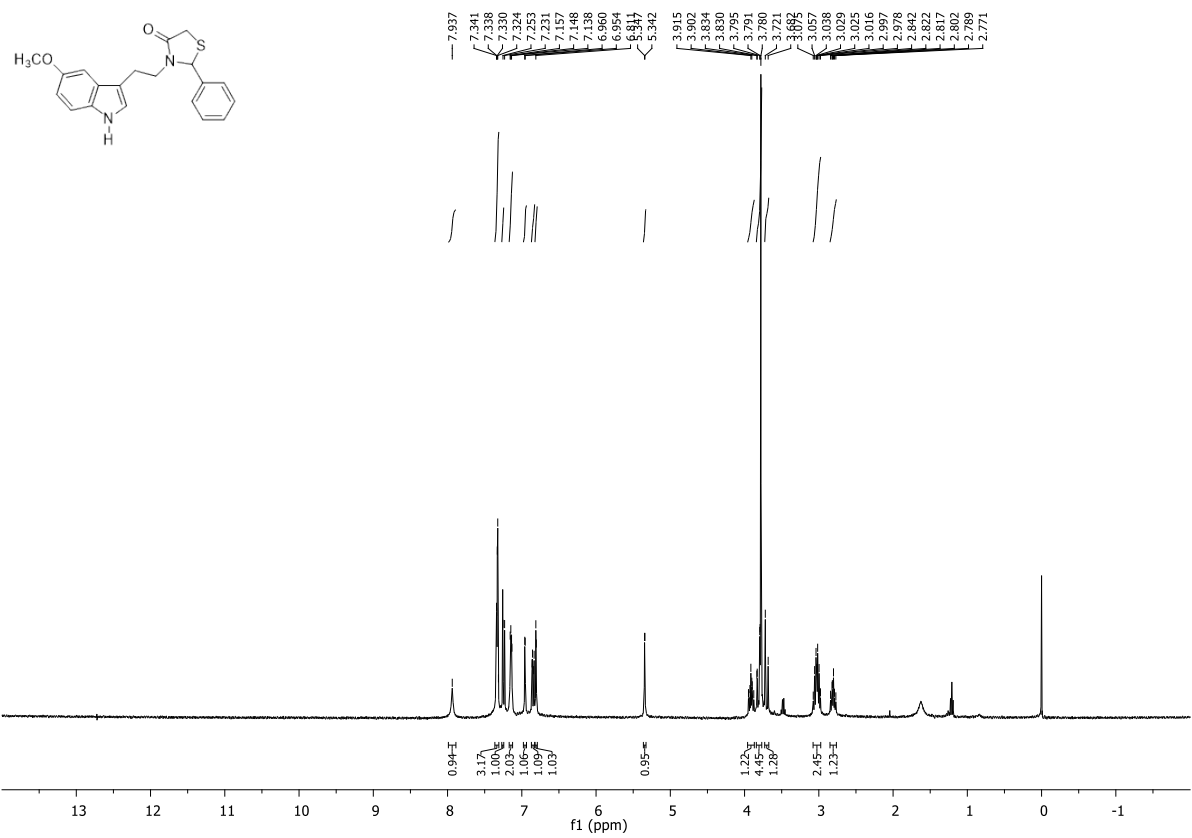

**Figure S18:** <sup>1</sup>H-NMR Spectrum of Compound YS5

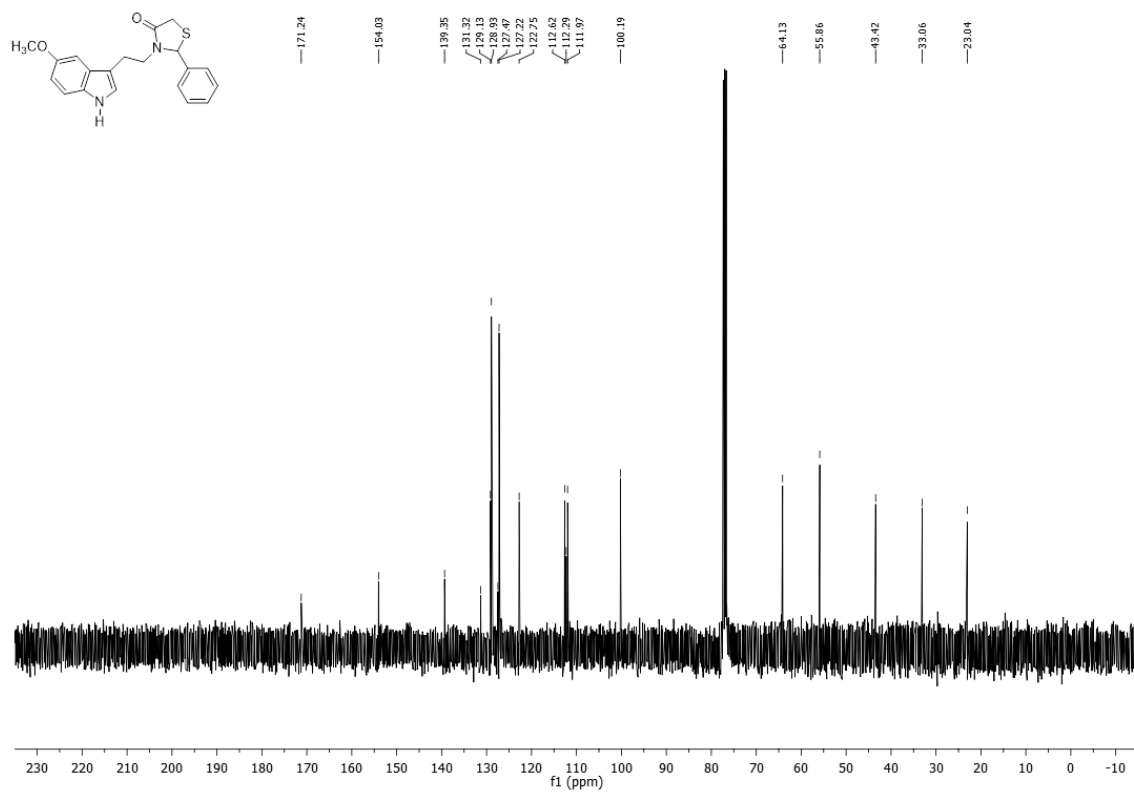

**Figure S19:** <sup>13</sup>C-NMR Spectrum of Compound YS5

## Elemental Composition Report

### Single Mass Analysis

Tolerance = 10000.0 PPM / DBE: min = -5.5, max = 1000.0

Element prediction: Off

Number of isotope peaks used for i-FIT = 9

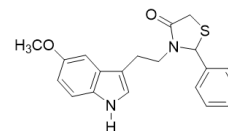

Monoisotopic Mass, Odd and Even Electron Ions

1 formula(e) evaluated with 1 results within limits (all results (up to 1000) for each mass)

Elements Used:

C: 20-20 H: 16-21 N: 2-2 O: 1-2 S: 1-1

Seher Aydin

41102\_20230928\_05-N01 18 (0.707) Cm (15:22)

1: TOF MS ES-  
1.58e+004

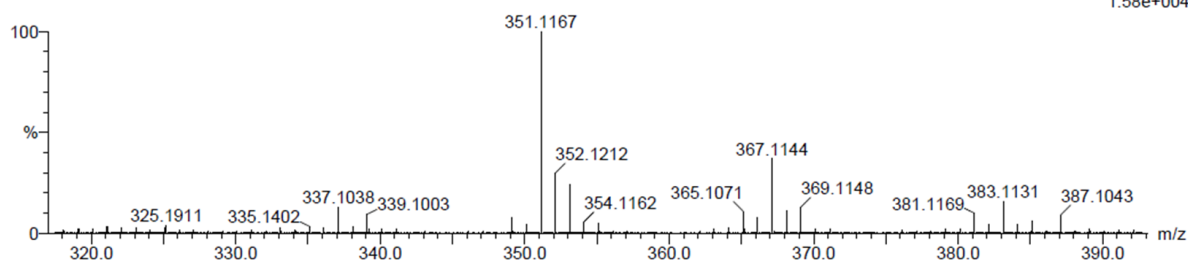

Minimum:

Maximum: 1000.0 10000.0 -5.5 1000.0

| Mass     | Calc. Mass | mDa | PPM | DBE  | i-FIT | i-FIT (Norm) | Formula         |
|----------|------------|-----|-----|------|-------|--------------|-----------------|
| 351.1167 | 351.1167   | 0.0 | 0.0 | 12.5 | 920.4 | 0.0          | C20 H19 N2 O2 S |

**Figure S20:** HRMS Spectrums of Compound YS5

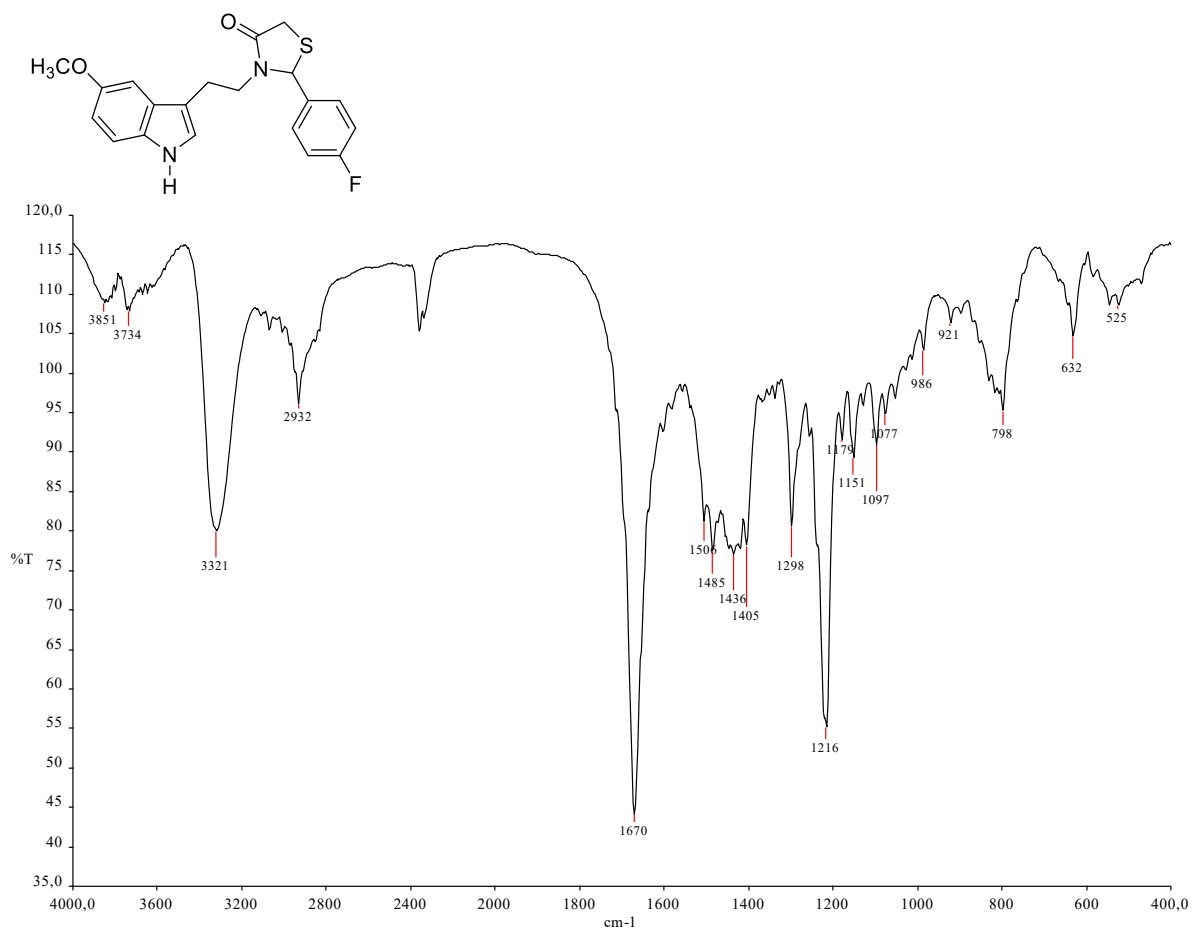

**Figure S21:** IR Spectrum of Compound YS6

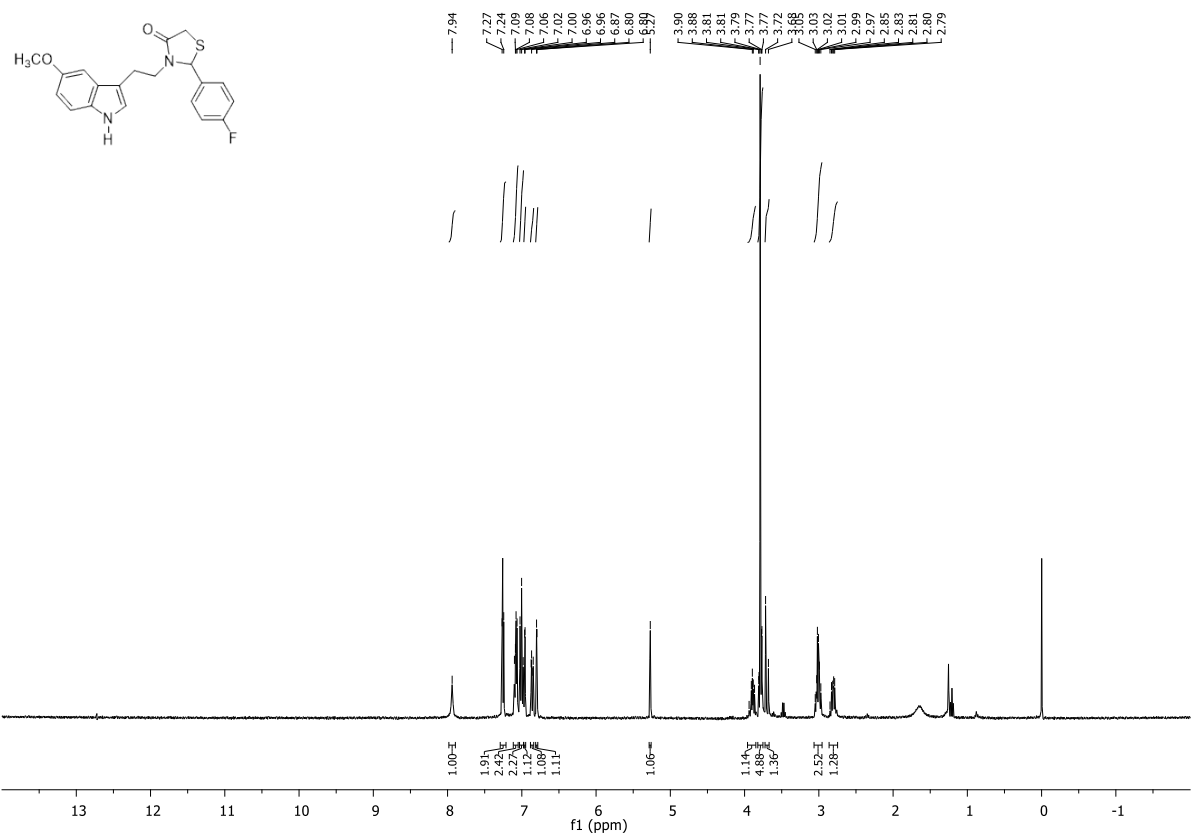

**Figure S22:** <sup>1</sup>H-NMR Spectrum of Compound YS6

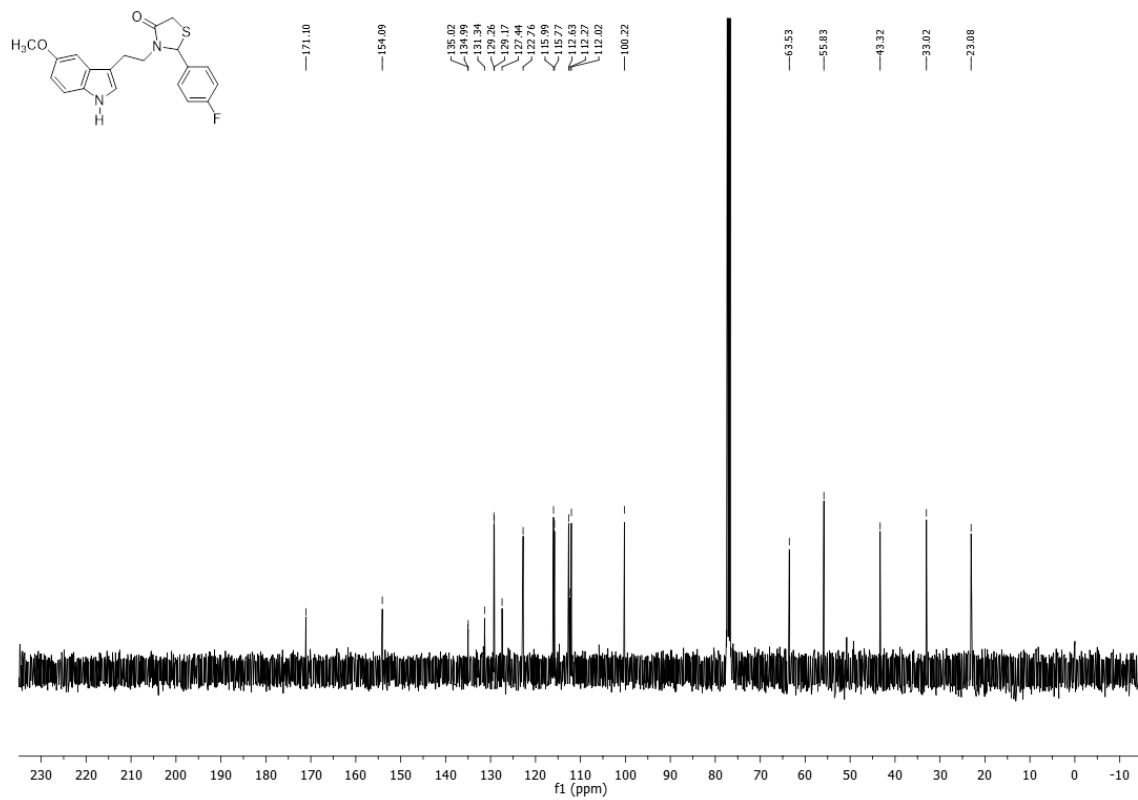

**Figure S23:** <sup>13</sup>C-NMR Spectrum of Compound YS6



## Elemental Composition Report

### Single Mass Analysis

Tolerance = 10000.0 PPM / DBE: min = -5.5, max = 1000.0

Element prediction: Off

Number of isotope peaks used for i-FIT = 9

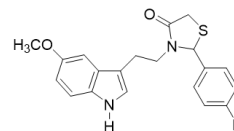

Monoisotopic Mass, Odd and Even Electron Ions

6 formula(e) evaluated with 1 results within limits (all results (up to 1000) for each mass)

Elements Used:

C: 20-20 H: 16-21 N: 2-5 O: 2-2 F: 1-2 S: 1-1

Seher Aydin

41102\_20230928\_06-01 12 (0.484) Cm (8:13)

1: TOF MS ES+  
5.77e+006

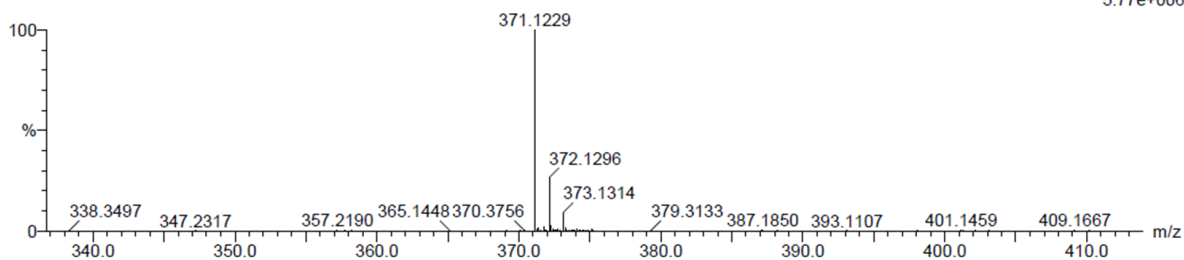

Minimum: -5.5  
Maximum: 1000.0 10000.0 1000.0

| Mass     | Calc. Mass | mDa  | PPM  | DBE  | i-FIT  | i-FIT (Norm) | Formula           |
|----------|------------|------|------|------|--------|--------------|-------------------|
| 371.1229 | 371.1230   | -0.1 | -0.3 | 11.5 | 1138.0 | 0.0          | C20 H20 N2 O2 F S |

**Figure S24:** HRMS Spectrums of Compound YS6

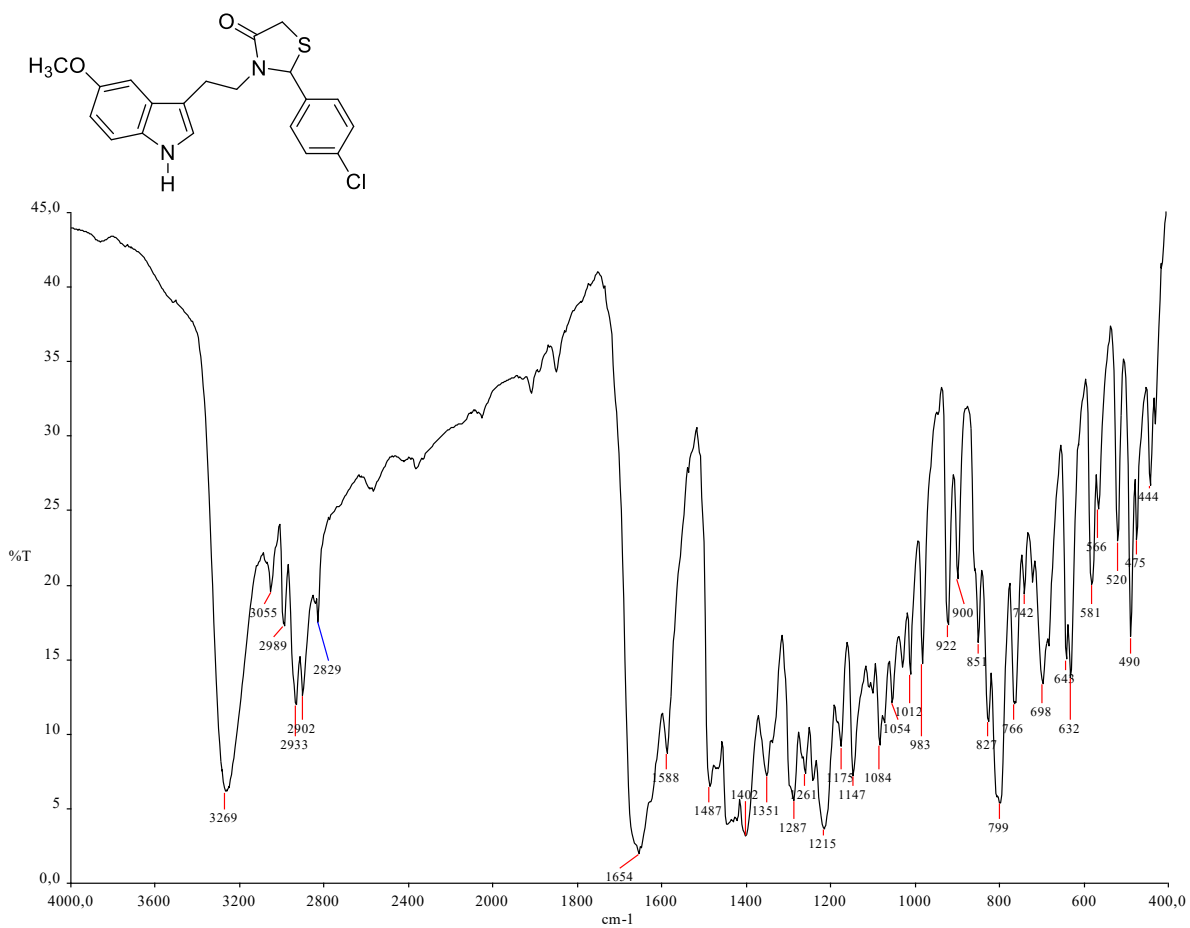

**Figure S25:** IR Spectrum of Compound YS7

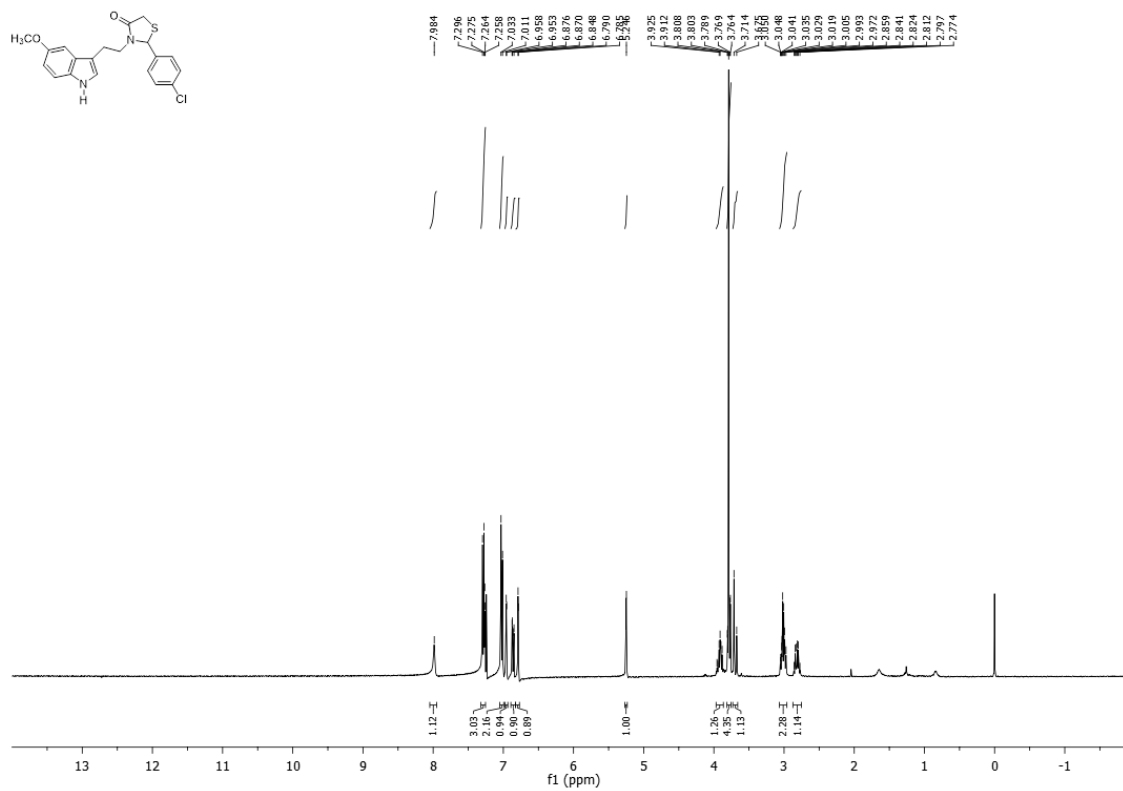

**Figure S26:** <sup>1</sup>H-NMR Spectrum of Compound YS7

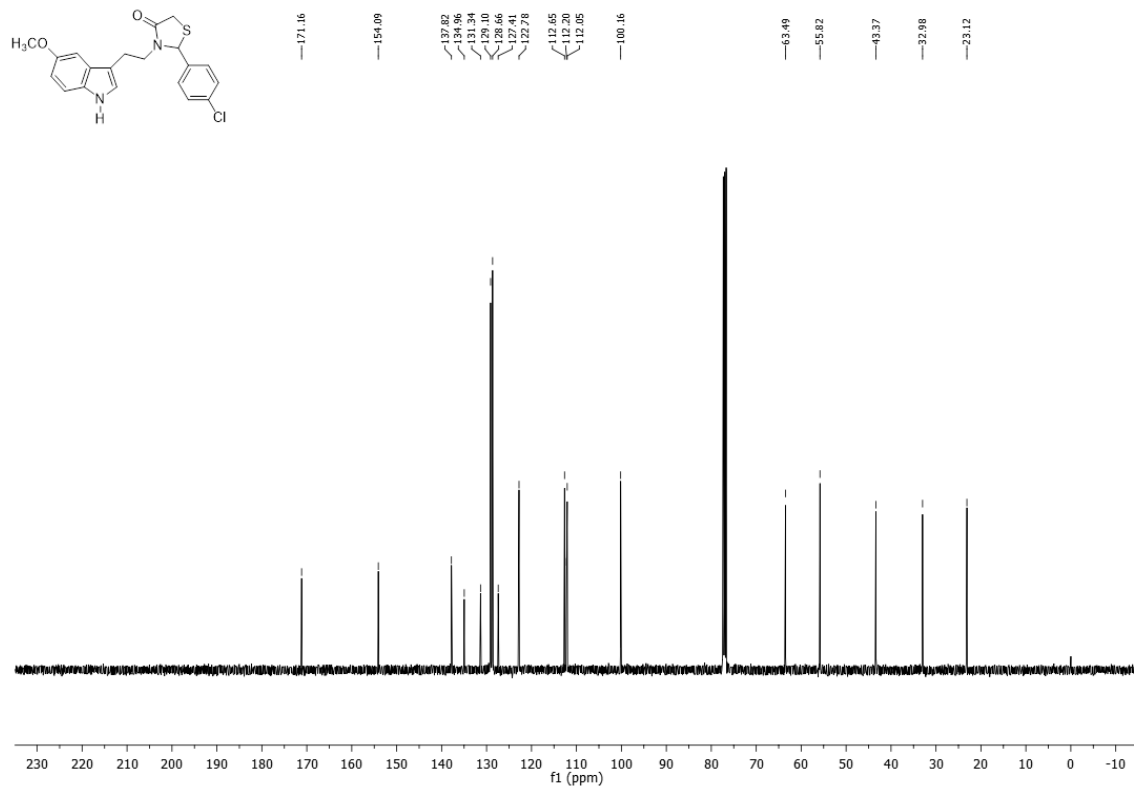

**Figure S27:** <sup>13</sup>C-NMR Spectrum of Compound YS7

## Elemental Composition Report

### Single Mass Analysis

Tolerance = 10000.0 PPM / DBE: min = -5.5, max = 1000.0

Element prediction: Off

Number of isotope peaks used for i-FIT = 9

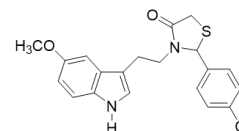

Monoisotopic Mass, Even Electron Ions

11 formula(e) evaluated with 1 results within limits (all results (up to 1000) for each mass)

Elements Used:

C: 20-20 H: 16-21 N: 2-5 O: 2-2 S: 1-1 Cl: 1-3

Seher Aydin

41102\_20230928\_07-02 4 (0.172) Cm (3:9)

1: TOF MS ES+  
3.41e+004

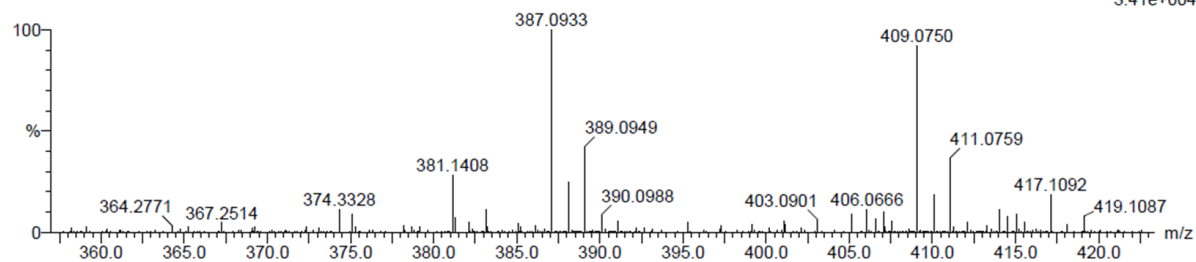

Minimum: -5.5  
Maximum: 1000.0 10000.0 1000.0

| Mass     | Calc. Mass | mDa  | PPM  | DBE  | i-FIT | i-FIT (Norm) | Formula            |
|----------|------------|------|------|------|-------|--------------|--------------------|
| 387.0933 | 387.0934   | -0.1 | -0.3 | 11.5 | 848.5 | 0.0          | C20 H20 N2 O2 S Cl |

**Figure S28:** HRMS Spectrums of Compound YS7

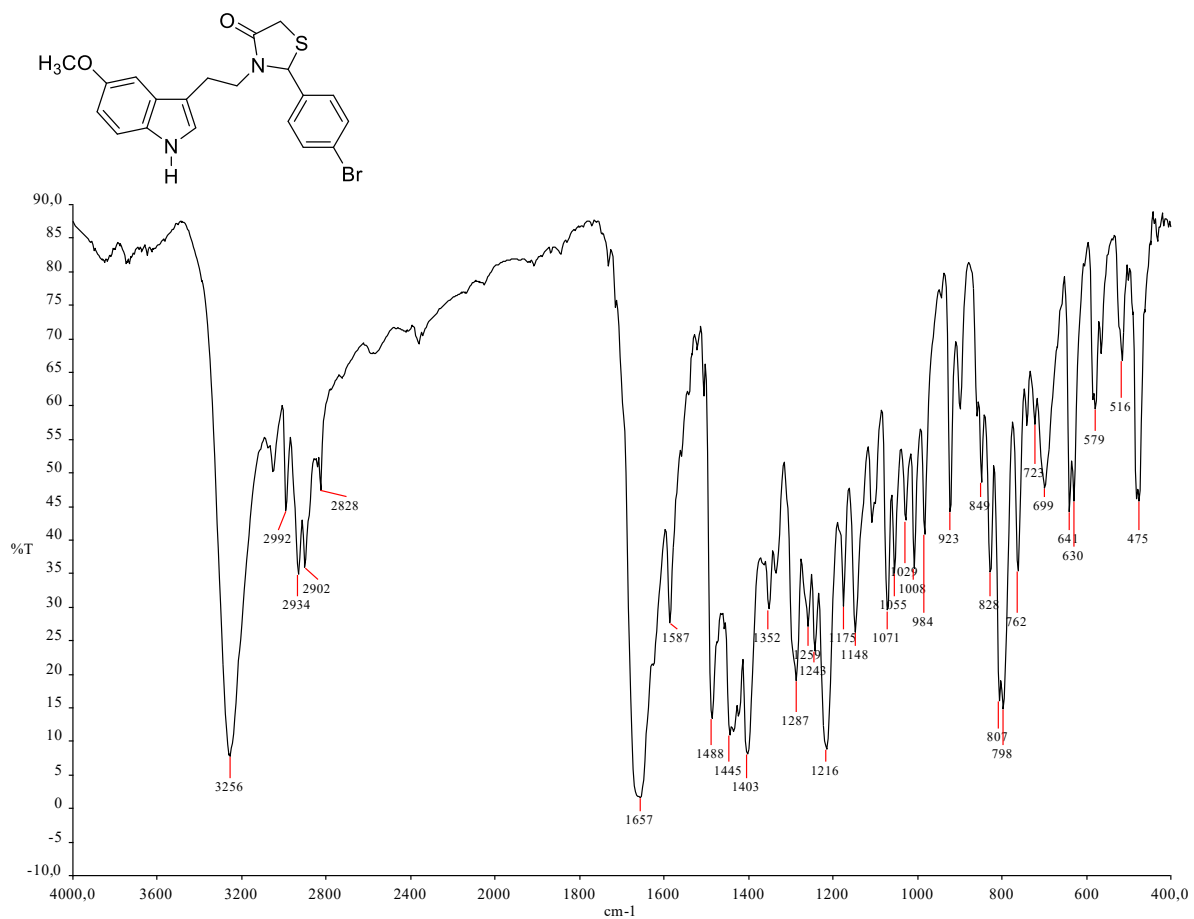

**Figure S29:** IR Spectrum of Compound YS8

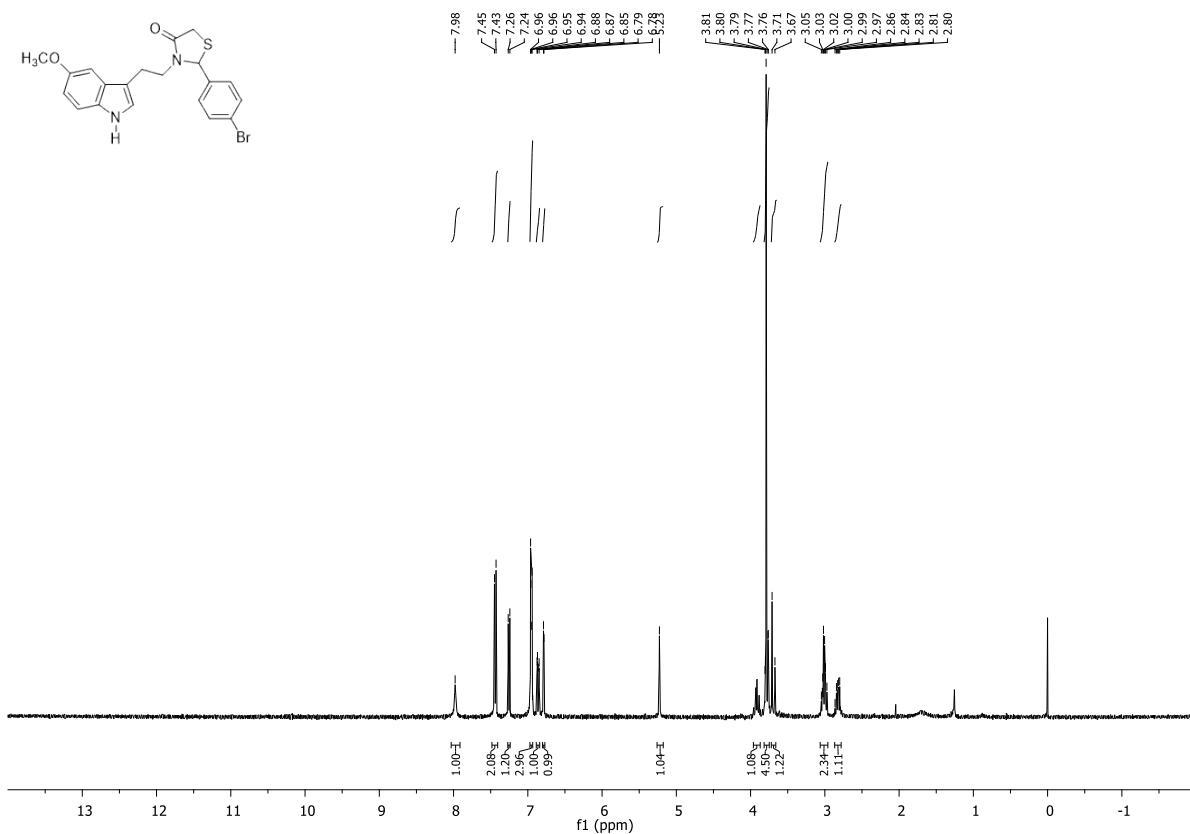

**Figure S30:** <sup>1</sup>H-NMR Spectrum of Compound YS8

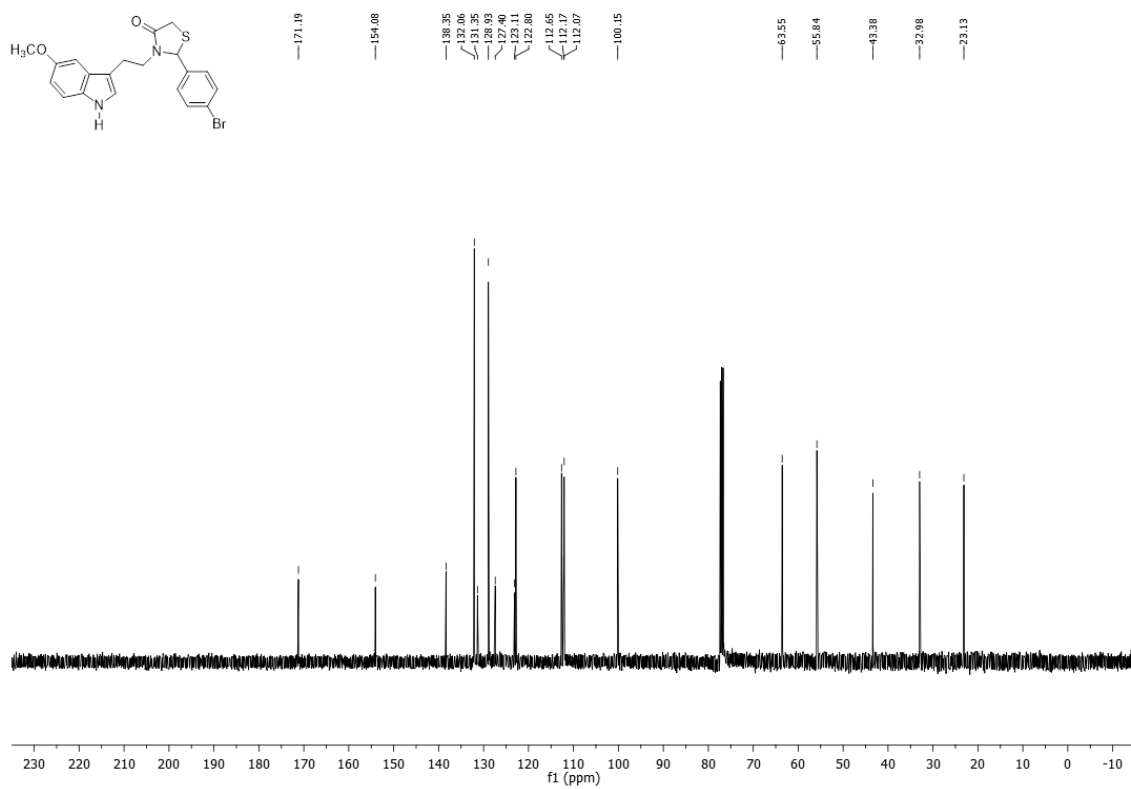

**Figure S31:** <sup>13</sup>C-NMR Spectrum of Compound YS8



## Elemental Composition Report

### Single Mass Analysis

Tolerance = 10000.0 PPM / DBE: min = -5.5, max = 1000.0

Element prediction: Off

Number of isotope peaks used for i-FIT = 9

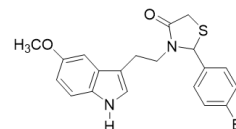

Monoisotopic Mass, Odd and Even Electron Ions

29 formula(e) evaluated with 1 results within limits (all results (up to 1000) for each mass)

Elements Used:

C: 20-20 H: 16-21 N: 2-5 O: 2-2 S: 1-1 79Br: 0-2 81Br: 0-2

Seher Aydin

41102\_20230928\_08-01 13 (0.518) Cm (10:13)

1: TOF MS ES+  
4.66e+006

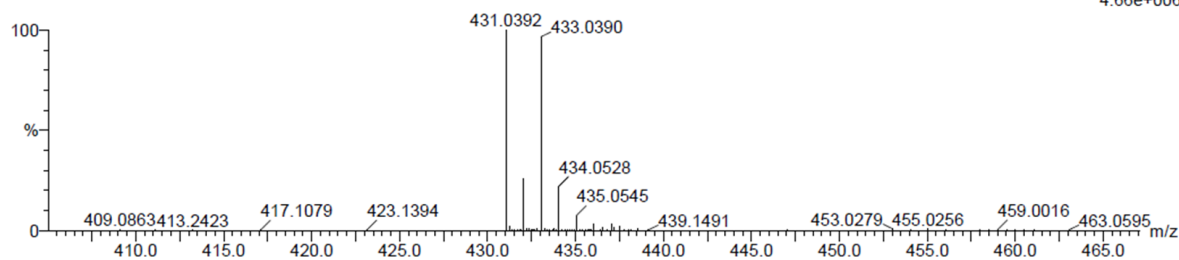

Minimum:

Maximum: 1000.0 10000.0 -5.5

| Mass | Calc. Mass | mDa | PPM | DBE | i-FIT | i-FIT (Norm) | Formula |
|------|------------|-----|-----|-----|-------|--------------|---------|
|------|------------|-----|-----|-----|-------|--------------|---------|

|          |          |      |      |      |        |     |                         |
|----------|----------|------|------|------|--------|-----|-------------------------|
| 433.0390 | 433.0408 | -1.8 | -4.2 | 11.5 | 1204.4 | 0.0 | C20 H20 N2 O2 S<br>81Br |
|----------|----------|------|------|------|--------|-----|-------------------------|

**Figure S32:** HRMS Spectrums of Compound YS8

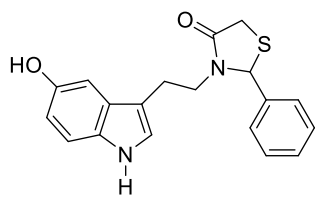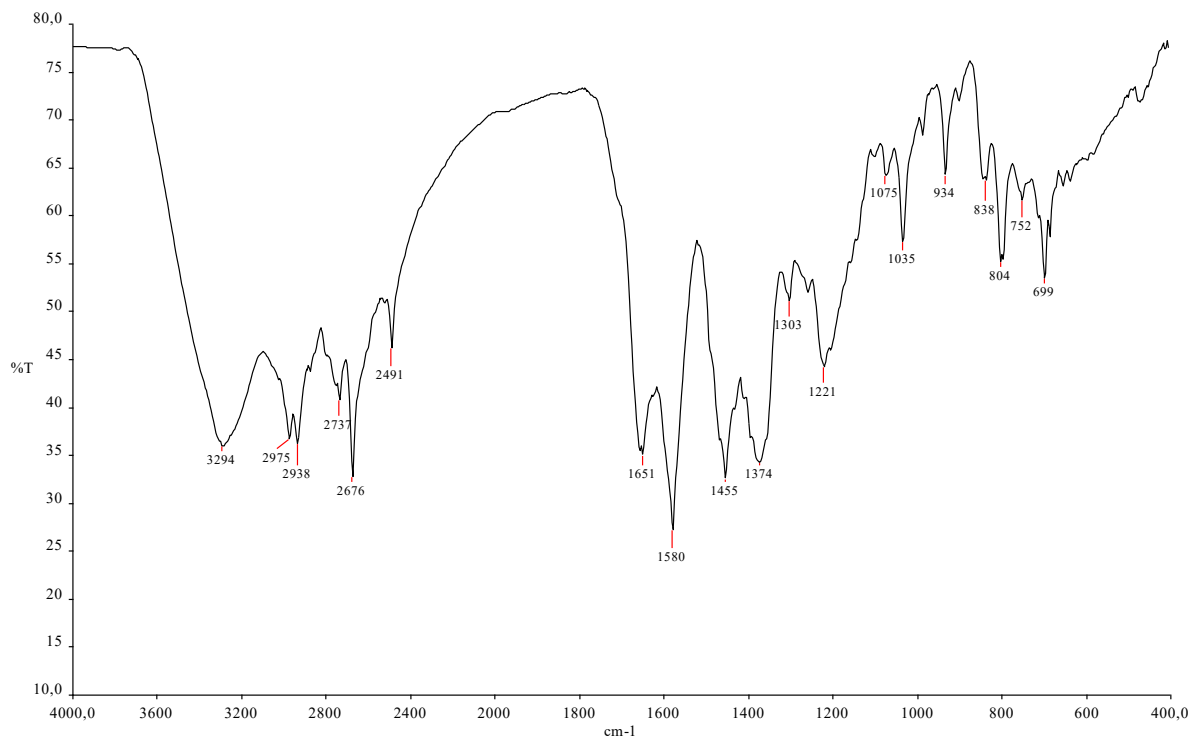

**Figure S33: IR Spectrum of Compound YS9**

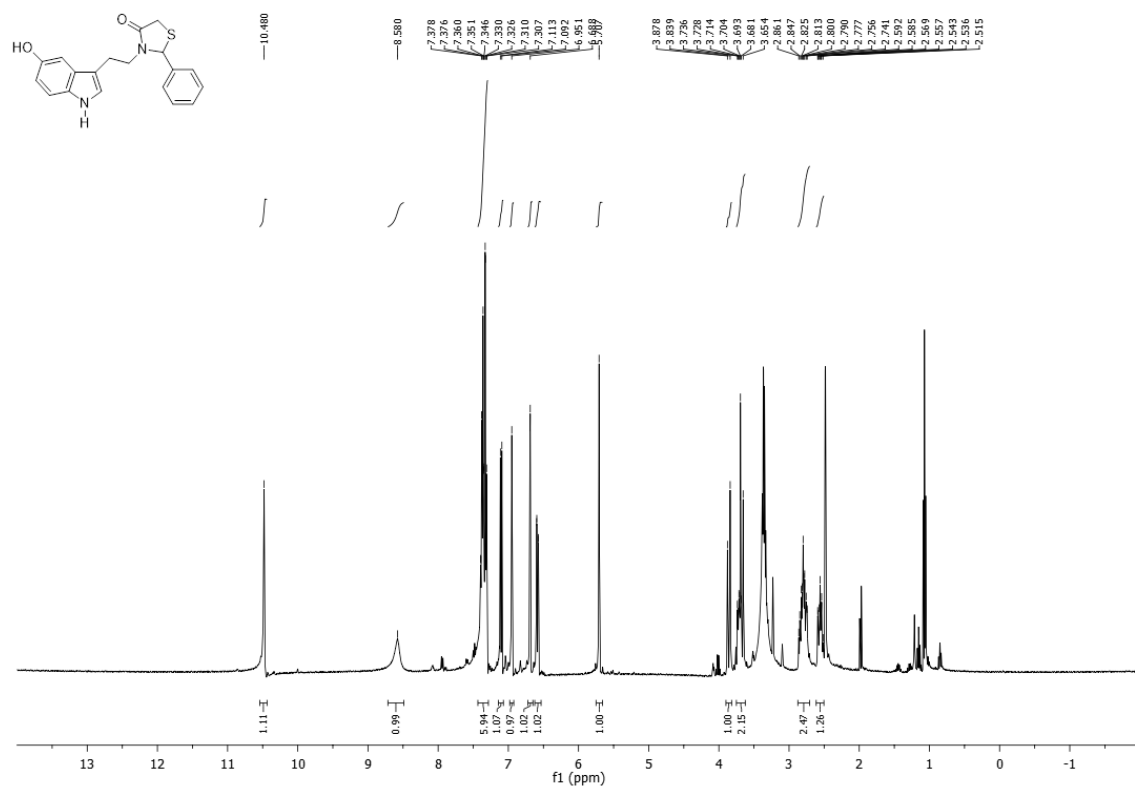

**Figure S34:** <sup>1</sup>H-NMR Spectrum of Compound YS9

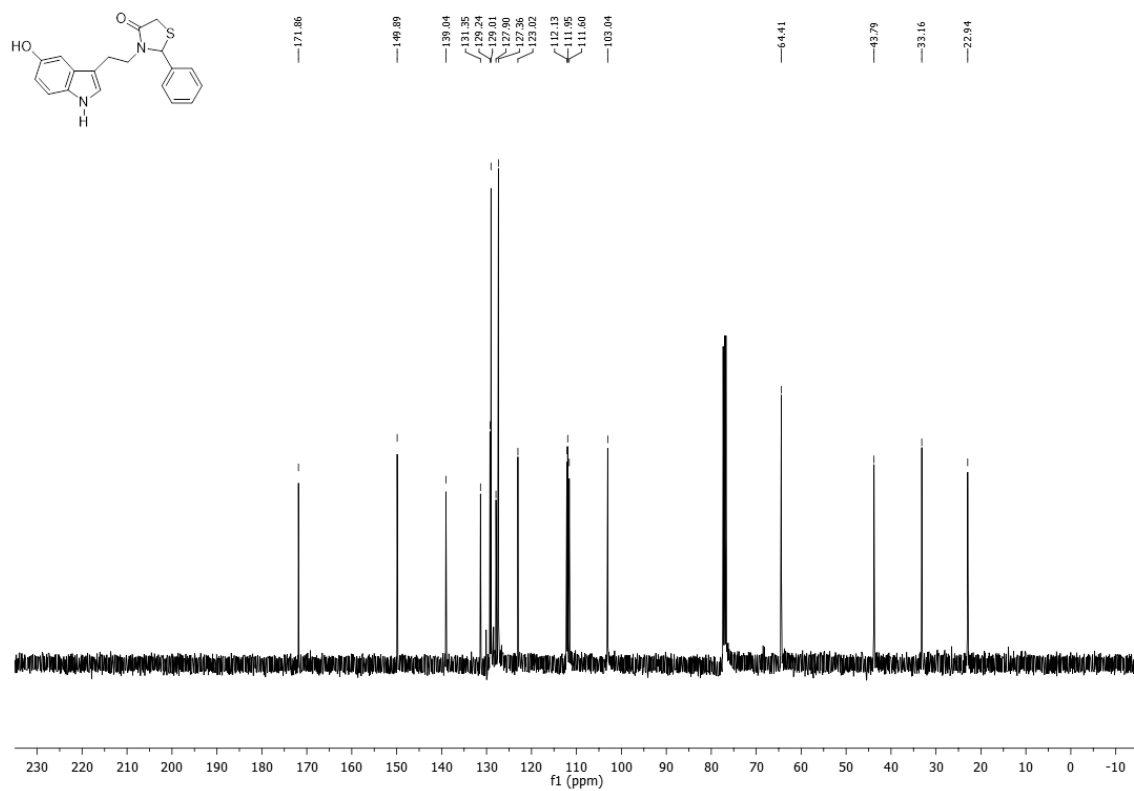

**Figure S35:** <sup>13</sup>C-NMR Spectrum of Compound YS9

## Elemental Composition Report

### Single Mass Analysis

Tolerance = 10000.0 PPM / DBE: min = -5.5, max = 1000.0

Element prediction: Off

Number of isotope peaks used for i-FIT = 9

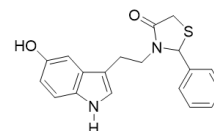

Monoisotopic Mass, Odd and Even Electron Ions

4 formula(e) evaluated with 1 results within limits (all results (up to 1000) for each mass)

Elements Used:

C: 19-19 H: 17-19 N: 2-5 O: 1-2 S: 1-1

Seher Aydin

41102\_20230926\_09-01 1 (0.070) Cm (1:11)

1: TOF MS ES+  
1.28e+004

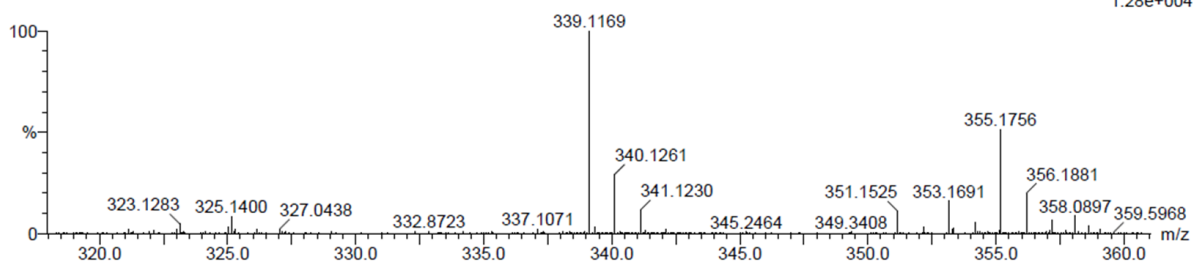

Minimum:

Maximum: 1000.0 10000.0 -5.5 1000.0

| Mass     | Calc. Mass | mDa | PPM | DBE  | i-FIT | i-FIT (Norm) | Formula         |
|----------|------------|-----|-----|------|-------|--------------|-----------------|
| 339.1169 | 339.1167   | 0.2 | 0.6 | 11.5 | 802.3 | 0.0          | C19 H19 N2 O2 S |

Figure S36: HRMS Spectrums of Compound YS9

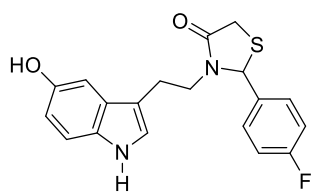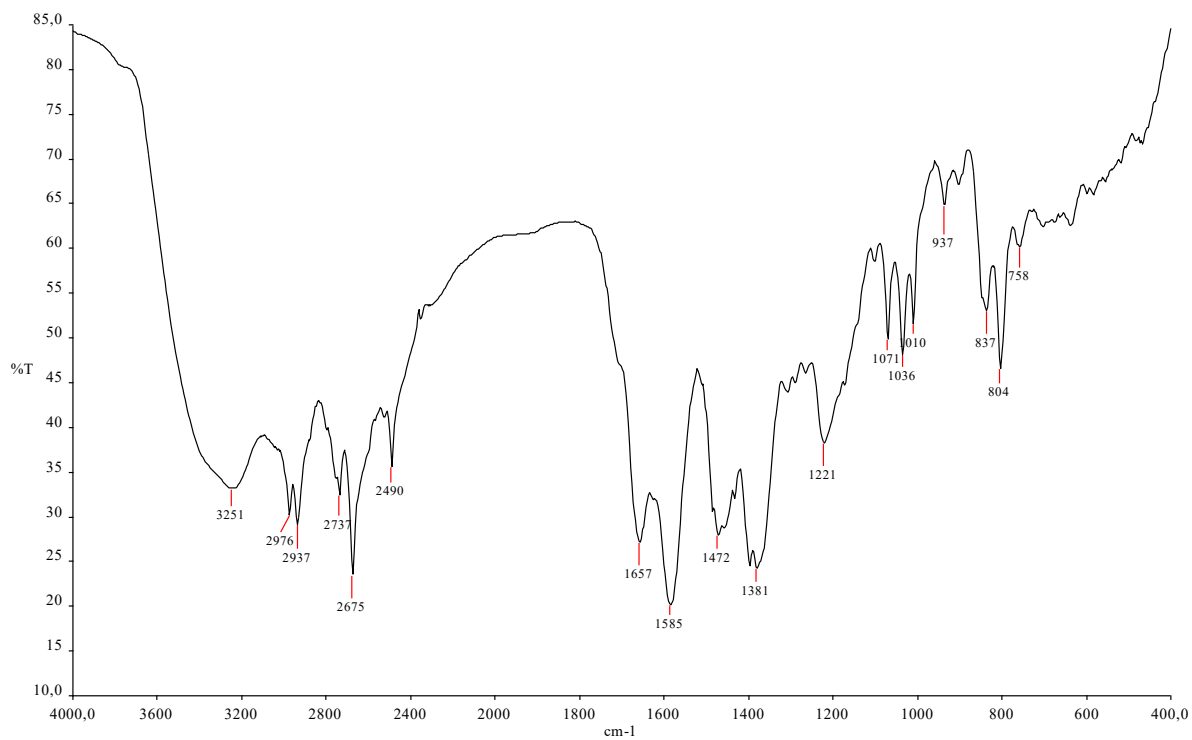

**Figure S37:** IR Spectrum of Compound YS10

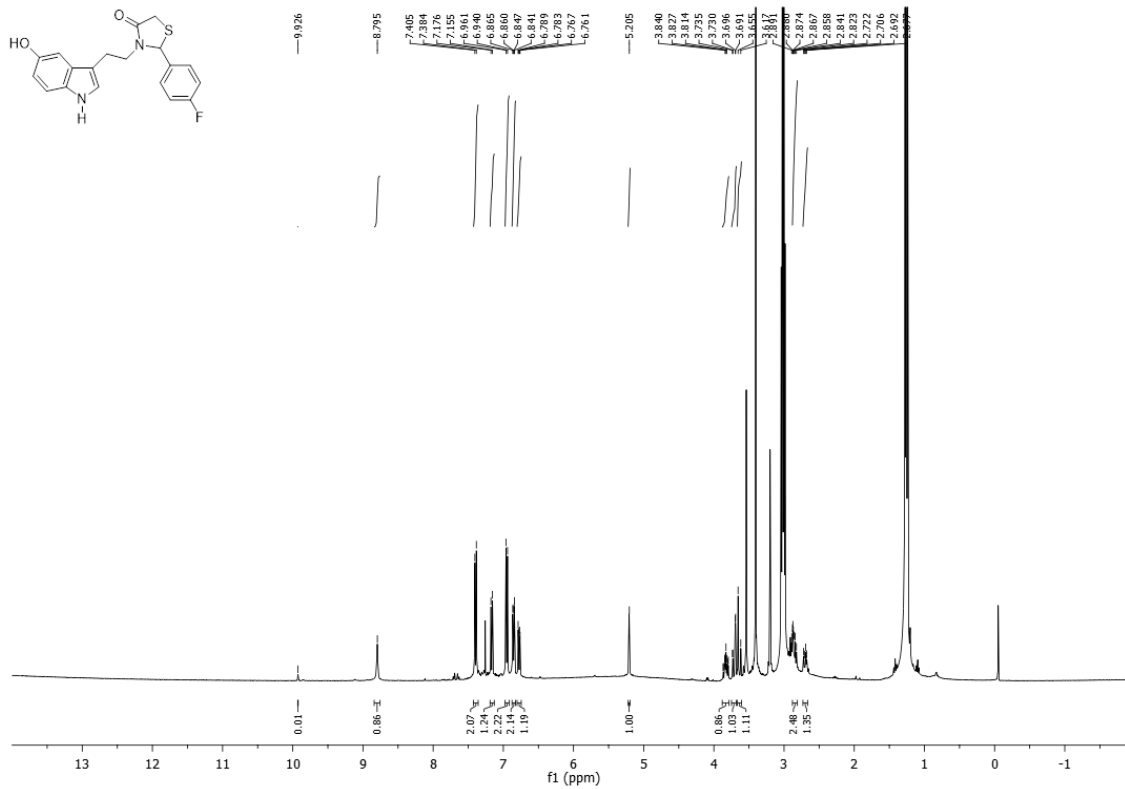

**Figure S38:** <sup>1</sup>H-NMR Spectrum of Compound YS10

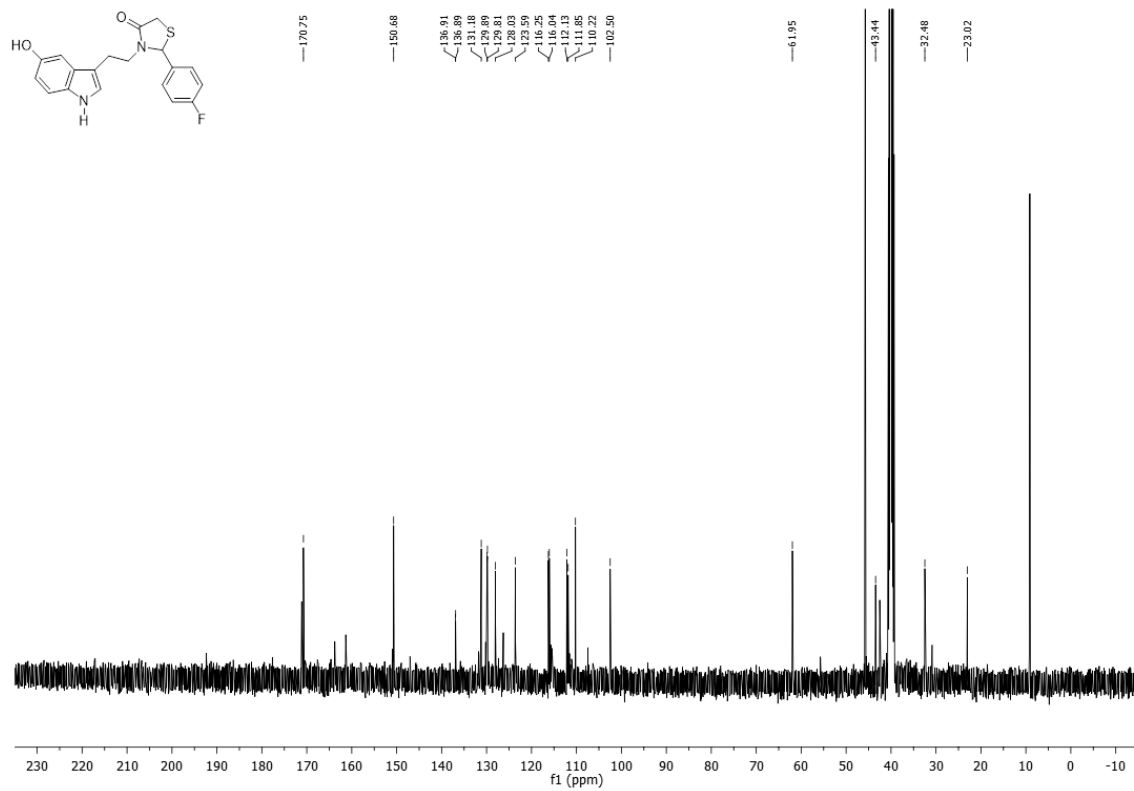

**Figure S39:**  $^{13}\text{C-NMR}$  Spectrum of Compound YS10



## Elemental Composition Report

### Single Mass Analysis

Tolerance = 10000.0 PPM / DBE: min = -5.5, max = 1000.0

Element prediction: Off

Number of isotope peaks used for i-FIT = 9

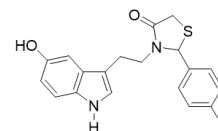

Monoisotopic Mass, Even Electron Ions

6 formula(e) evaluated with 1 results within limits (all results (up to 1000) for each mass)

Elements Used:

C: 19-19 H: 16-19 N: 2-5 O: 2-2 F: 1-2 S: 1-1

Seher Aydin

41102\_20230926\_10-N01 15 (0.586) Cm (14:25)

1: TOF MS ES-  
1.10e+004

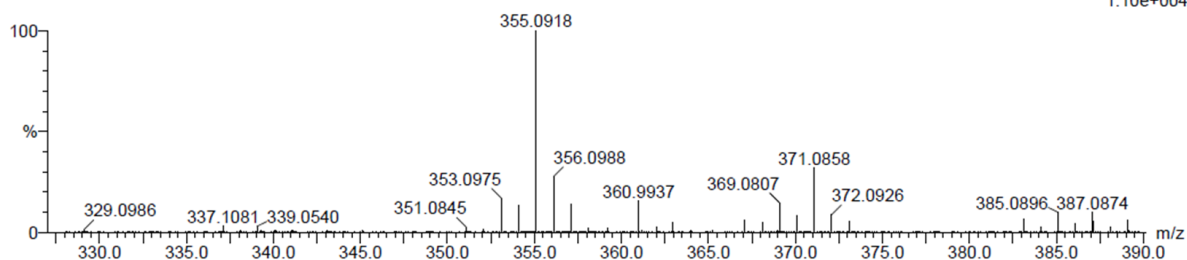

Minimum: -5.5  
Maximum: 1000.0 10000.0 1000.0

| Mass     | Calc. Mass | mDa | PPM | DBE  | i-FIT | i-FIT (Norm) | Formula           |
|----------|------------|-----|-----|------|-------|--------------|-------------------|
| 355.0918 | 355.0917   | 0.1 | 0.3 | 12.5 | 773.9 | 0.0          | C19 H16 N2 O2 F S |

**Figure S40:** HRMS Spectrums of Compound **YS10**

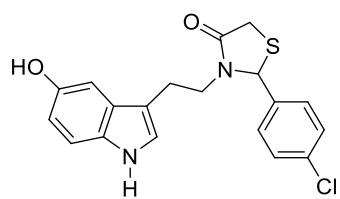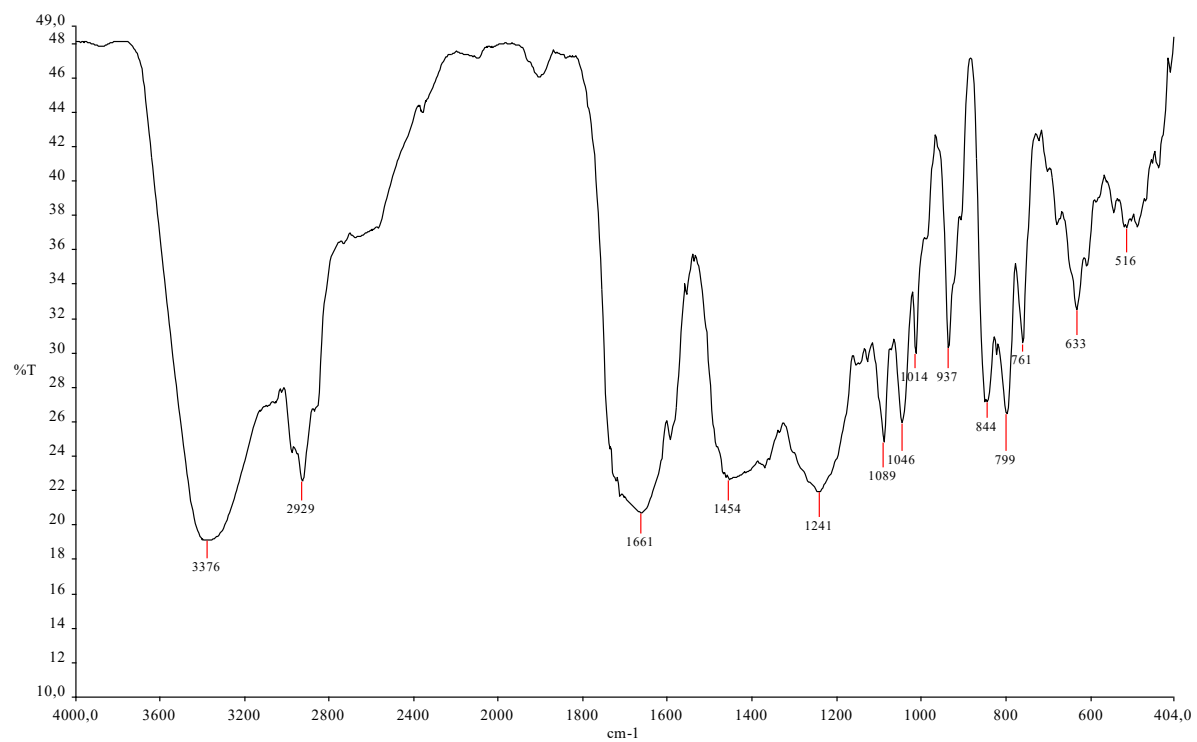

**Figure S41: IR Spectrum of Compound YS11**

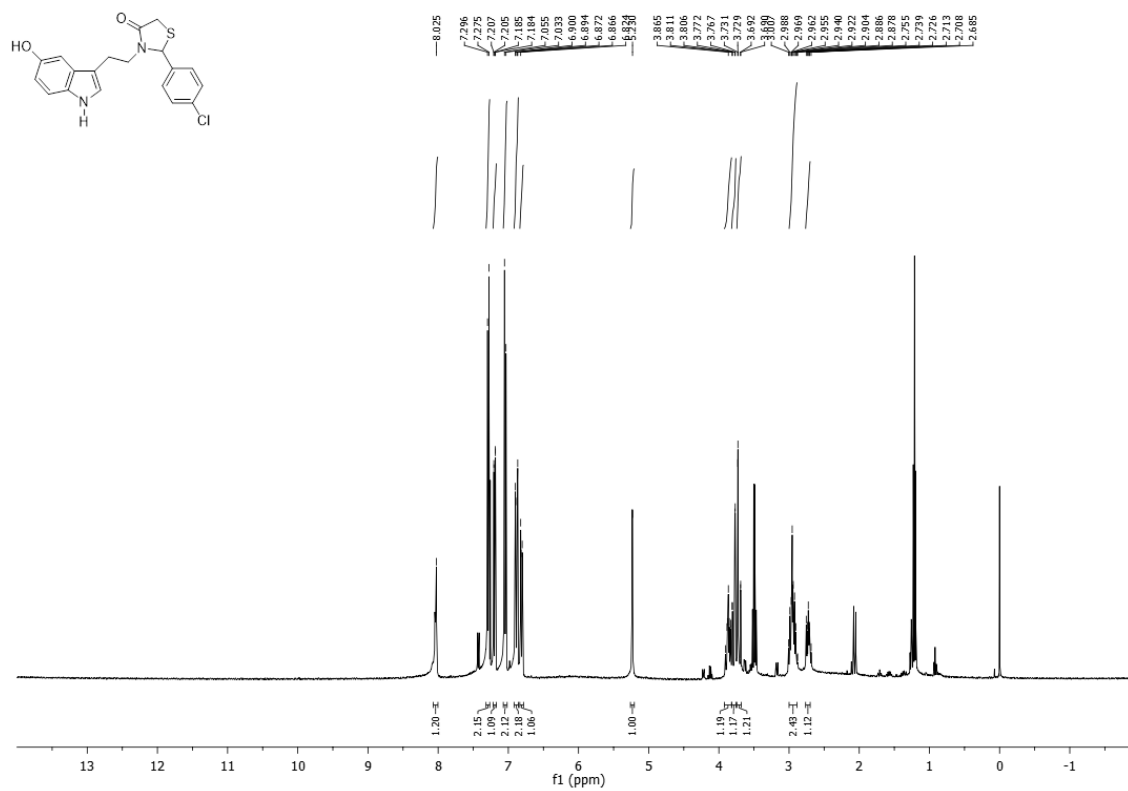

**Figure S42:** <sup>1</sup>H-NMR Spectrum of Compound YS11

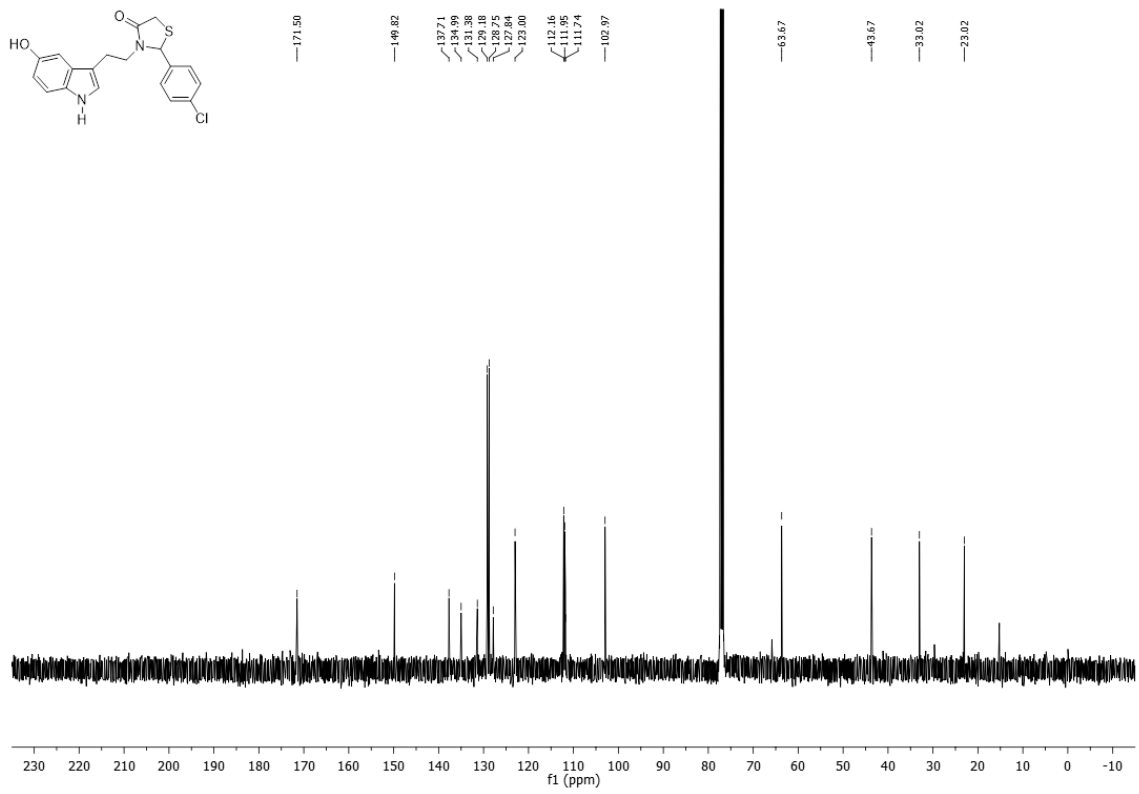

**Figure S43:**  $^{13}\text{C-NMR}$  Spectrum of Compound YS11

## Elemental Composition Report

### Single Mass Analysis

Tolerance = 10000.0 PPM / DBE: min = -5.5, max = 1000.0

Element prediction: Off

Number of isotope peaks used for i-FIT = 9

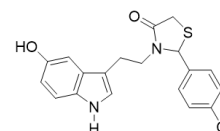

Monoisotopic Mass, Odd and Even Electron Ions

11 formula(e) evaluated with 1 results within limits (all results (up to 1000) for each mass)

Elements Used:

C: 19-19 H: 16-19 N: 2-5 O: 2-2 S: 1-1 Cl: 1-3

Seher Aydin

41102\_20230926\_11-01 4 (0.172) Cm (4:22)

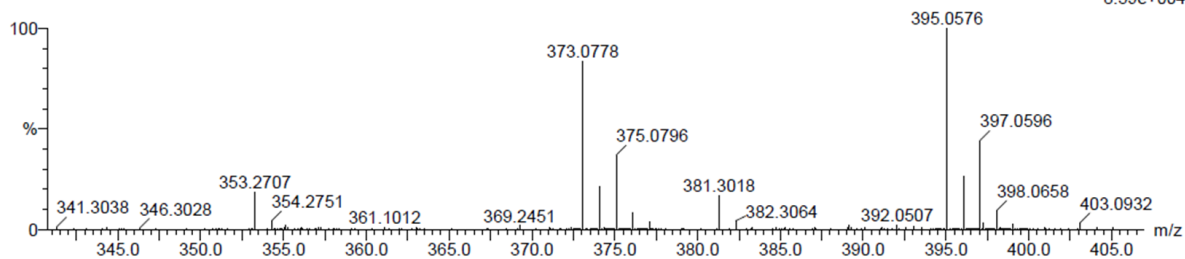

| Minimum: |            |        |         | -5.5   |        |              |                    |  |
|----------|------------|--------|---------|--------|--------|--------------|--------------------|--|
| Maximum: |            | 1000.0 | 10000.0 | 1000.0 |        |              |                    |  |
| Mass     | Calc. Mass | mDa    | PPM     | DBE    | i-FIT  | i-FIT (Norm) | Formula            |  |
| 373.0778 | 373.0778   | 0.0    | 0.0     | 11.5   | 1262.4 | 0.0          | C19 H18 N2 O2 S Cl |  |

**Figure S44:** HRMS Spectrums of Compound YS11

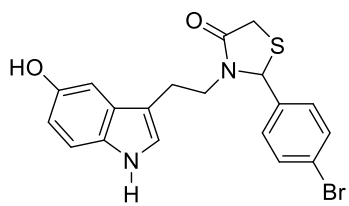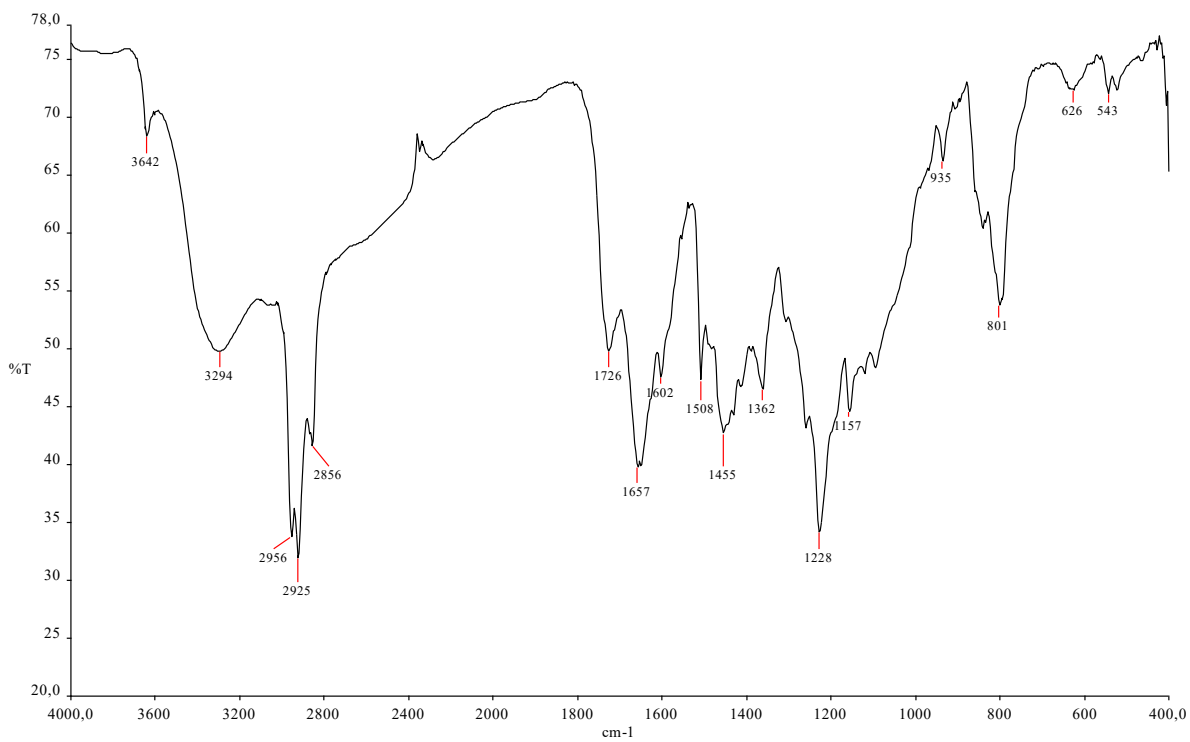

**Figure S45:** IR Spectrum of Compound YS12

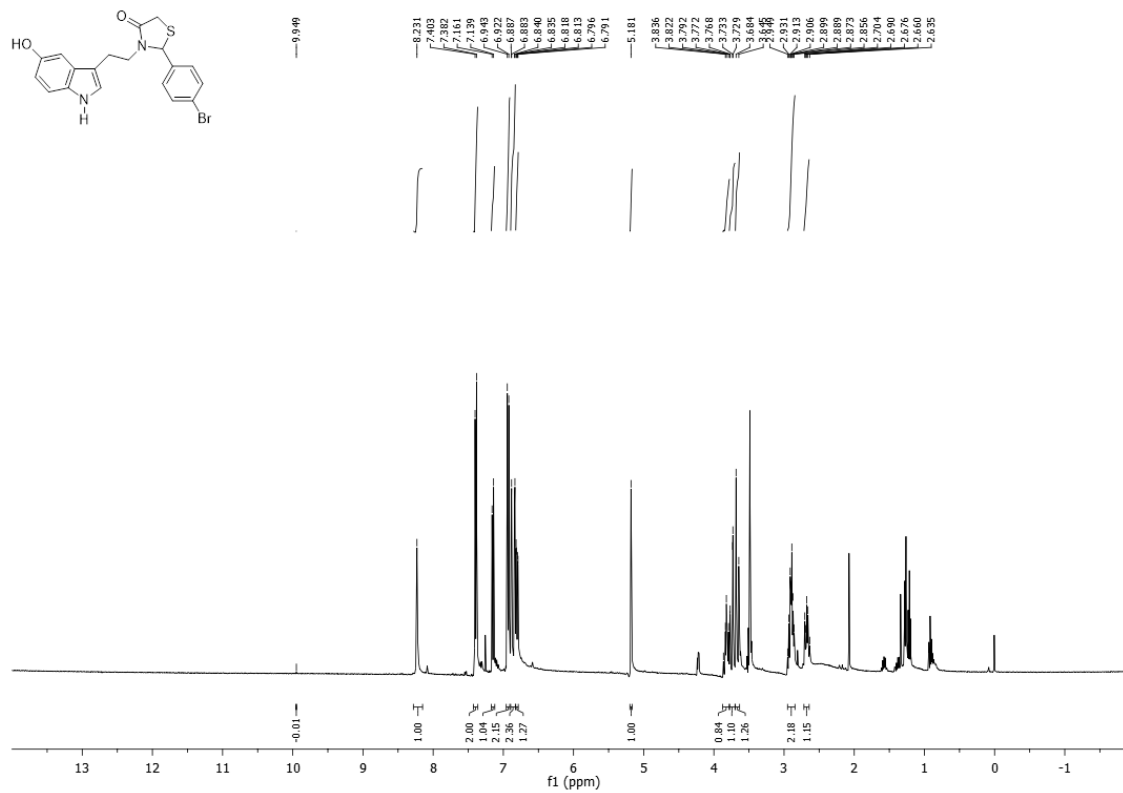

**Figure S46:**  $^1\text{H-NMR}$  Spectrum of Compound YS12

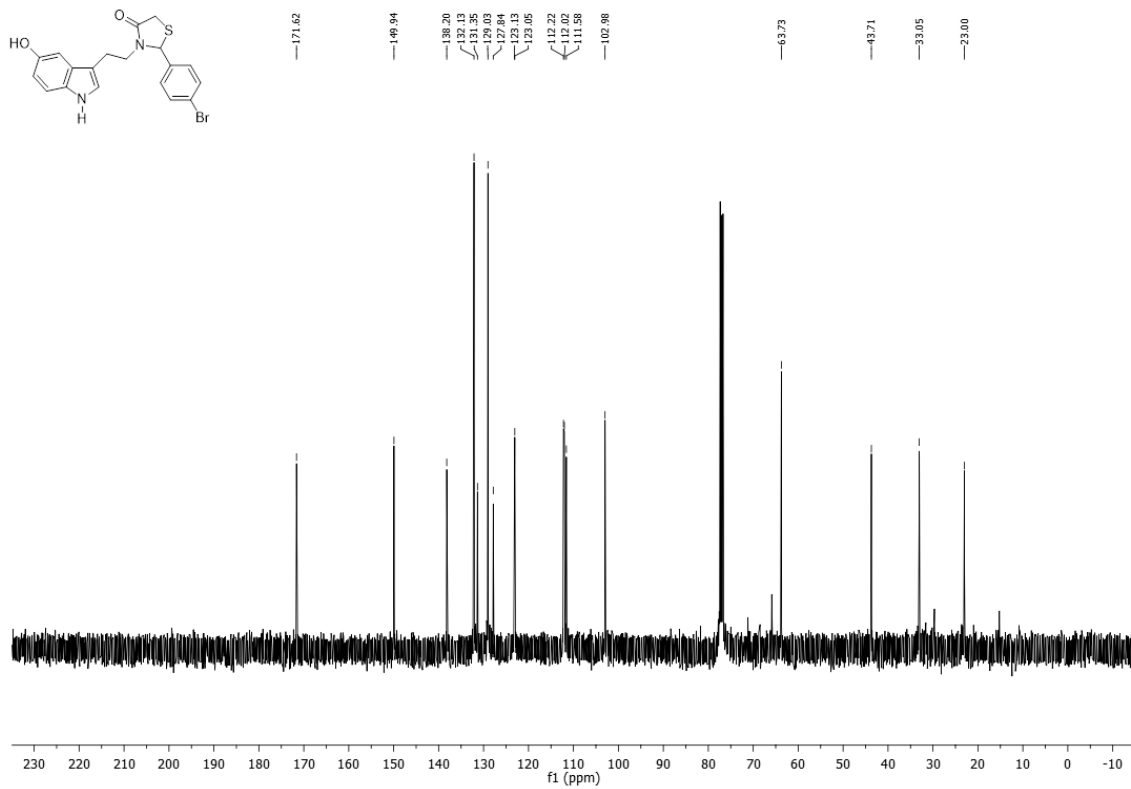

**Figure S47:** <sup>13</sup>C-NMR Spectrum of Compound YS12



## Elemental Composition Report

### Single Mass Analysis

Tolerance = 10000.0 PPM / DBE: min = -5.5, max = 1000.0

Element prediction: Off

Number of isotope peaks used for i-FIT = 9

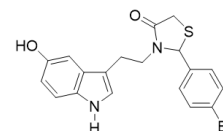

Monoisotopic Mass, Odd and Even Electron Ions

29 formula(e) evaluated with 1 results within limits (all results (up to 1000) for each mass)

Elements Used:

C: 19-19 H: 16-19 N: 2-5 O: 2-2 S: 1-1 79Br: 0-2 81Br: 0-2

Seher Aydin

41102\_20230927\_12-02 10 (0.396) Cm (2:11)

1: TOF MS ES+  
6.38e+003

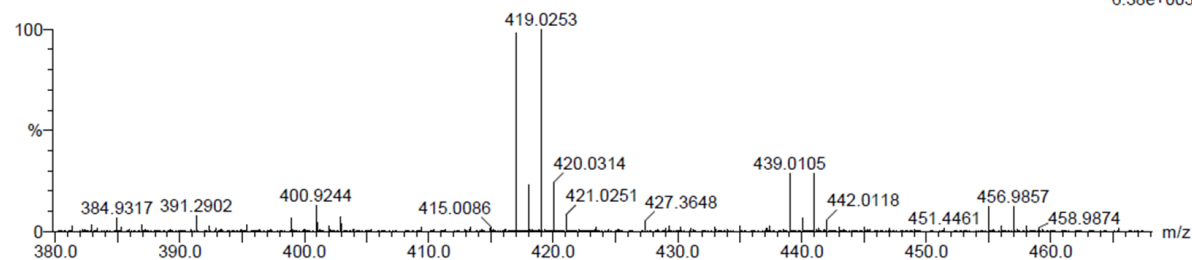

Minimum: -5.5  
Maximum: 1000.0 10000.0 1000.0

| Mass     | Calc. Mass | mDa | PPM | DBE  | i-FIT | i-FIT (Norm) | Formula              |
|----------|------------|-----|-----|------|-------|--------------|----------------------|
| 419.0253 | 419.0252   | 0.1 | 0.2 | 11.5 | 705.6 | 0.0          | C19 H18 N2 O2 S 81Br |

Figure S48: HRMS Spectrums of Compound YS12

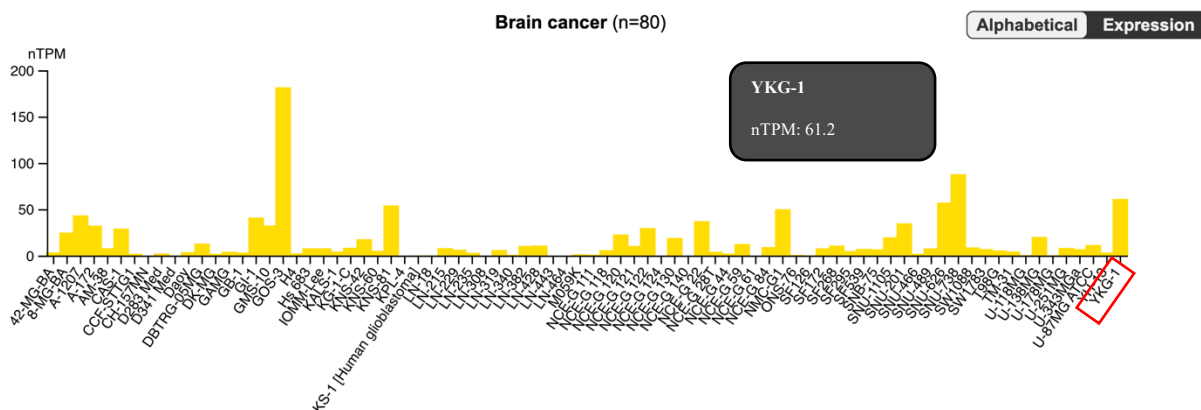

Figure S49: Overexpression of A1R1 in YKG-1 cell line.

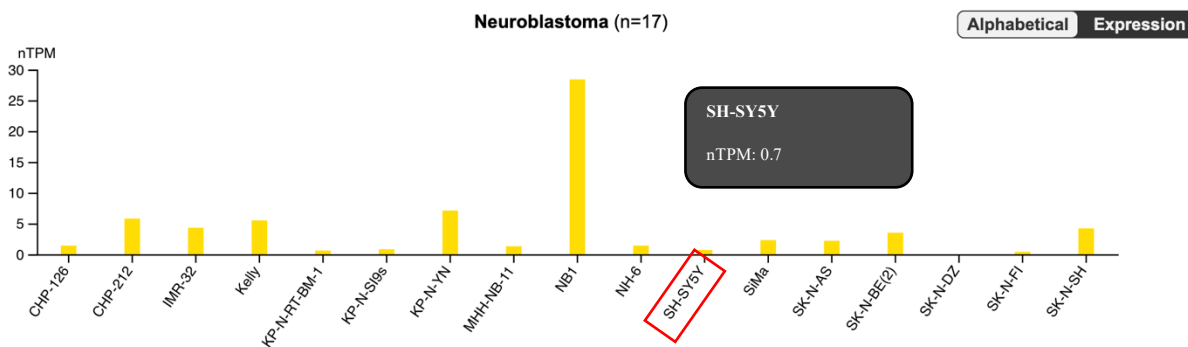

Figure S50: Overexpression of A1R1 in SH-SY5Y cell line.



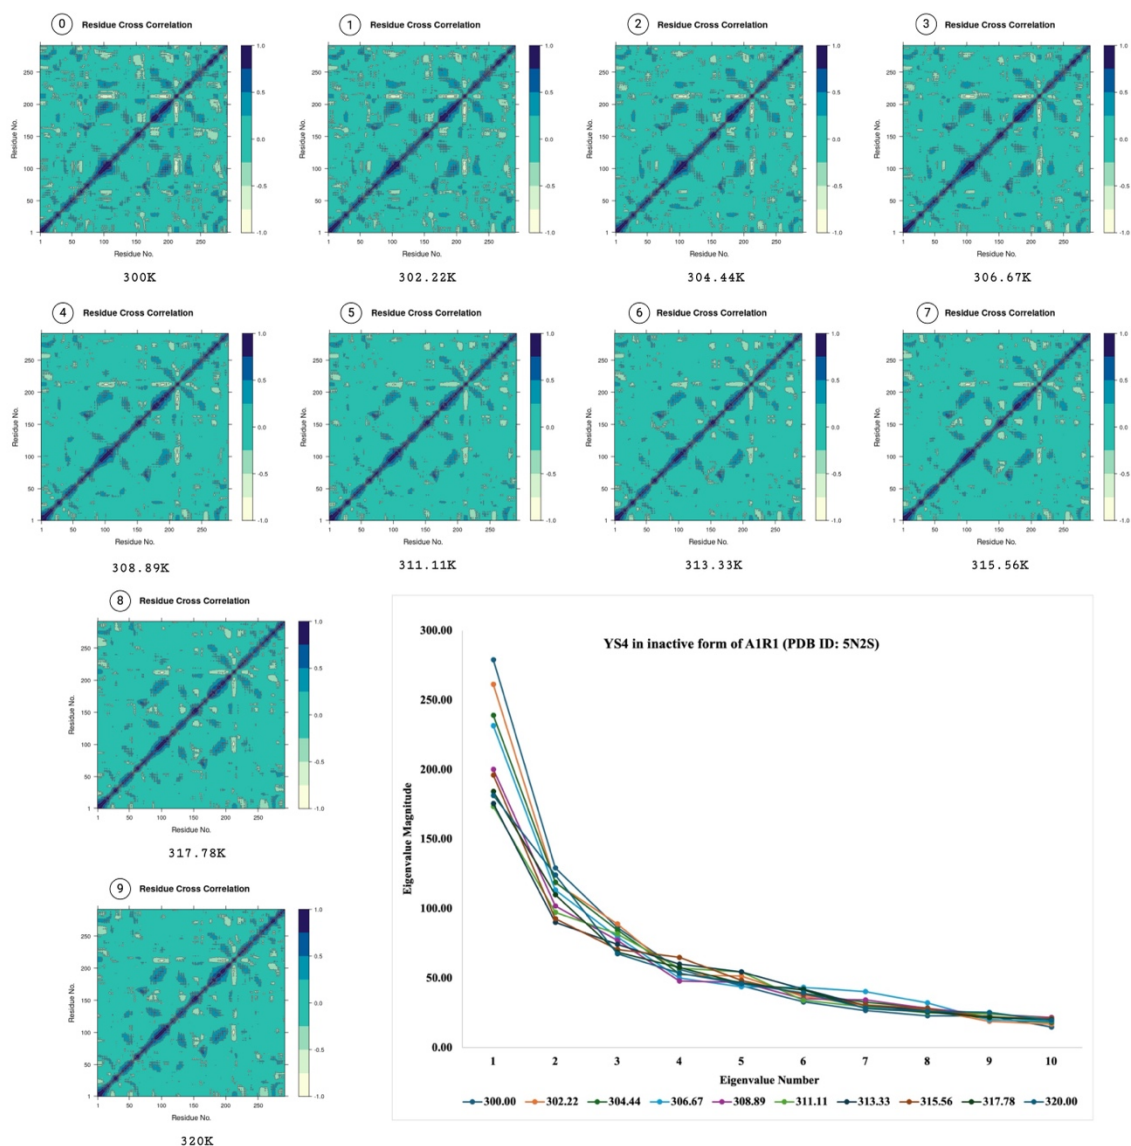

**Figure S53:** PCA showing the eigenvalue magnitudes of 10ns temperature-based replica exchange MD simulations (bottom-right) of YS4 in the inactive form of A1R1 (PDB ID: 5N2S). 10 replicas have been run with a temperature range of 300-320K. Figure sections 0-9 show the residue cross correlation graphs between residues of the protein's first frame against the remaining simulation duration. Created with BioRender.com

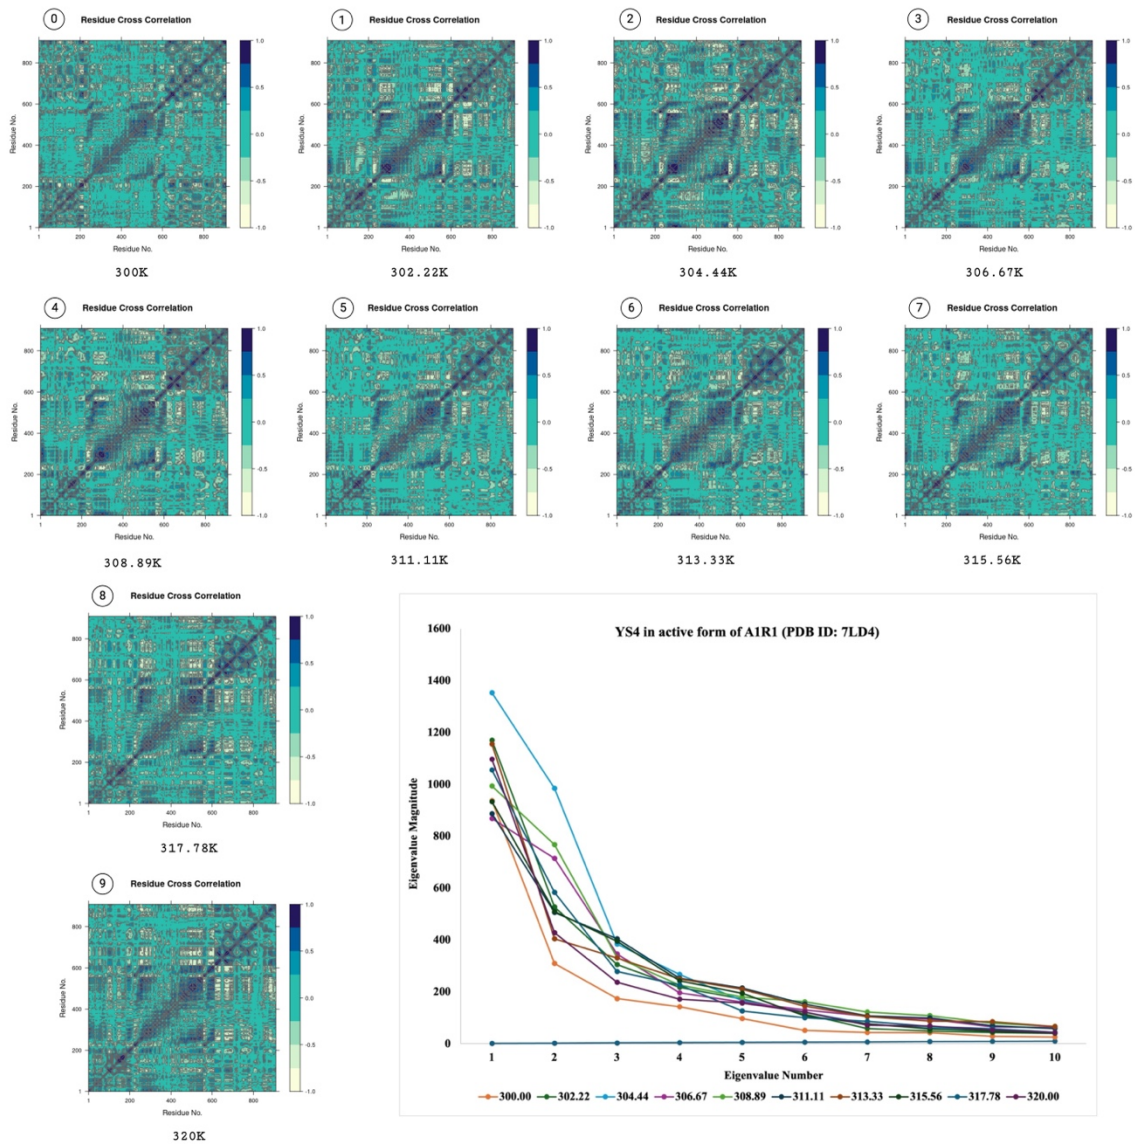

**Figure S54:** PCA showing the eigenvalue magnitudes of 10ns temperature-based replica exchange MD simulations (bottom-right) of YS4 in the active form of A1R1 (PDB ID: 7LD4). 10 replicas have been run with a temperature range of 300-320K. Figure sections 0-9 show the residue cross correlation graphs between residues of the protein's first frame against the remaining simulation duration. Created with BioRender.com

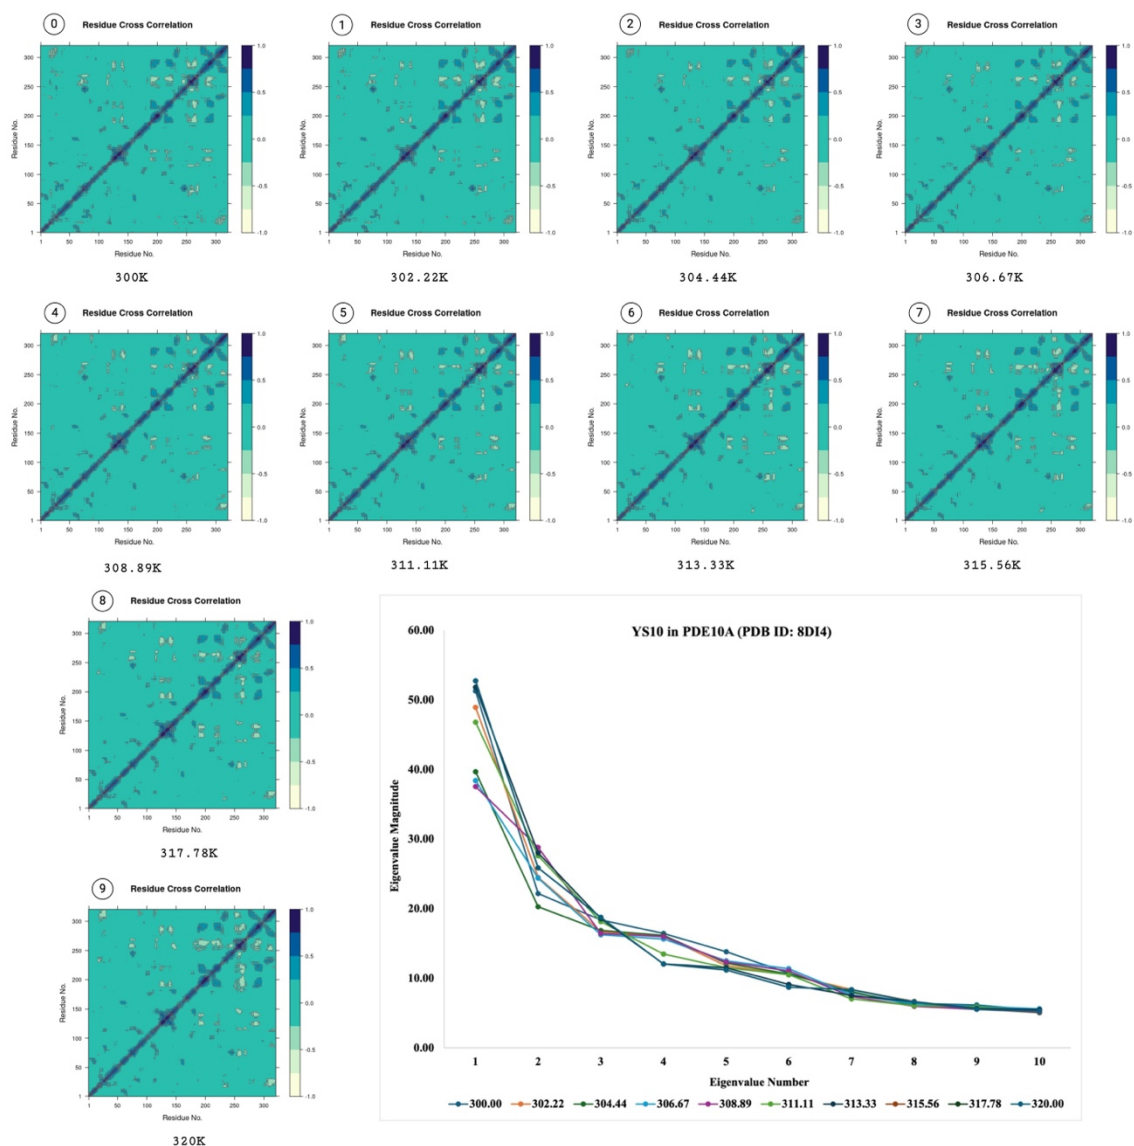

**Figure S55:** PCA showing the eigenvalue magnitudes of 10ns temperature-based replica exchange MD simulations (bottom-right) of **YS10** in PDE10A (PDB ID: 8DI4). 10 replicas have been run with a temperature range of 300-320K. Figure sections 0-9 show the residue cross correlation graphs between residues of the protein's first frame against the remaining simulation duration. Created with BioRender.com

**Table S1:** Binary QSAR Disease Model Parameters

| <b>Disease</b> | <b>Parameters</b>                                                                                                                                                                                                                                                                                                                                                                                                               |
|----------------|---------------------------------------------------------------------------------------------------------------------------------------------------------------------------------------------------------------------------------------------------------------------------------------------------------------------------------------------------------------------------------------------------------------------------------|
| Depression     | Evaluating potential activity against depression, the cutoff is set at 0.5. Values surpassing 0.5 suggest potentially active compounds. The training set comprises approved drugs, with a model description involving a training set of N=335, test set of N=62, sensitivity of 0.93, specificity of 0.82, accuracy of 0.87, and MCC of 0.75.                                                                                   |
| Bacterial      | Assessing potential antibacterial activity, the cutoff is established at 0.5. Values exceeding 0.5 indicate potential activity. The training set includes approved drugs, with a model description featuring a training set of N=530, test set of N=97, sensitivity of 0.87, specificity of 0.90, accuracy of 0.89, and MCC of 0.77.                                                                                            |
| Cancer         | Investigating potential activity against cancer, the cutoff is set at 0.5. Values surpassing 0.5 signify potential activity. The training set encompasses approved drugs, with a model description consisting of a training set of N=886, test set of N=167, sensitivity of 0.89, specificity of 0.83, accuracy of 0.86, and MCC of 0.72.                                                                                       |
| HIV            | Exploring potential activity against HIV, the cutoff is fixed at 0.5. Values exceeding 0.5 indicate potential activity. The training set involves approved drugs, drug candidates in clinical trials, and preclinical compounds with in vivo activity. The model description includes a training set of N=491, test set of N=80, sensitivity of 0.80, specificity of 0.86, accuracy of 0.84, and MCC of 0.67.                   |
| Heart Failure  | Examining potential activity against heart failure, the cutoff is set at 0.5. Values surpassing 0.5 suggest potential activity. The training set comprises approved drugs, with a model description featuring a training set of N=204, test set of N=33, sensitivity of 0.78, specificity of 0.87, accuracy of 0.82, and MCC of 0.64.                                                                                           |
| Hyperlipidemia | Assessing potential antihyperlipidemic activity, the cutoff is established at 0.5. Values exceeding 0.5 indicate potential activity. The training set includes approved drugs, with a model description consisting of a training set of N=185, test set of N=24, sensitivity of 0.75, specificity of 0.92, accuracy of 0.83, and MCC of 0.68.                                                                                   |
| Obesity        | Exploring potential activity against obesity, the cutoff is fixed at 0.5. Values exceeding 0.5 indicate potential activity. The training set involves approved drugs, drug candidates in clinical trials, and preclinical compounds with in vivo activity. The model description includes a training set of N=472, test set of N=75, sensitivity of 0.89, specificity of 0.97, accuracy of 0.93, and MCC of 0.87.               |
| Allergy        | Investigating potential antiallergic activity, the cutoff is set at 0.5. Values surpassing 0.5 suggest potential activity. The training set comprises approved drugs, with a model description featuring a training set of N=258, test set of N=47, sensitivity of 0.87, specificity of 0.88, accuracy of 0.87, and MCC of 0.74.                                                                                                |
| Alzheimer      | Evaluating potential activity against Alzheimer's disease, the cutoff is set at 0.5. Values exceeding 0.5 indicate potential activity. The training set encompasses approved drugs, drug candidates in clinical trials, and preclinical compounds with in vivo activity. The model description includes a training set of N=261, test set of N=44, sensitivity of 0.91, specificity of 0.82, accuracy of 0.86, and MCC of 0.73. |
| Parkinson      | Examining potential activity against Parkinson's disease, the cutoff is set at 0.5. Values surpassing 0.5 suggest potential activity. The training set comprises approved drugs, drug candidates in clinical trials, and preclinical compounds with in vivo activity. The model description features a training set of N=298, test set of N=49, sensitivity of 0.96, specificity of 0.96, accuracy of 0.96, and MCC of 0.92.    |
| Thrombosis     | Assessing potential antithrombotic activity, the cutoff is established at 0.5. Values exceeding 0.5 indicate potential activity. The training set includes approved drugs, drug candidates in clinical trials, and preclinical compounds with in vivo activity. The model description consists of a training set of N=453, test set of N=80, sensitivity of 0.98, specificity of 0.95, accuracy of 0.97, and MCC of 0.93.       |
| Diabetes       | Exploring potential antidiabetic activity, the cutoff is fixed at 0.5. Values exceeding 0.5 indicate potential activity. The training set involves approved drugs, drug candidates in clinical trials, and preclinical compounds with in vivo activity. The model description features a training set of N=195, test set of N=34, sensitivity of 0.85, specificity of 0.93, accuracy of 0.88, and MCC of 0.77.                  |

|               |                                                                                                                                                                                                                                                                                                                                                                                                                                  |
|---------------|----------------------------------------------------------------------------------------------------------------------------------------------------------------------------------------------------------------------------------------------------------------------------------------------------------------------------------------------------------------------------------------------------------------------------------|
| Psoriasis     | Investigating potential activity against psoriasis, the cutoff is set at 0.5. Values surpassing 0.5 suggest potential activity. The training set comprises approved drugs, drug candidates in clinical trials, and preclinical compounds with in vivo activity. The model description includes a training set of N=199, test set of N=32, sensitivity of 0.93, specificity of 0.82, accuracy of 0.89, and MCC of 0.74.           |
| Viral         | Assessing potential antiviral activity, the cutoff is established at 0.5. Values exceeding 0.5 indicate potential activity. The training set includes approved drugs, with a model description consisting of a training set of N=206, test set of N=35, sensitivity of 0.92, specificity of 0.95, accuracy of 0.94, and MCC of 0.88.                                                                                             |
| Migraine      | Examining potential activity against migraine, the cutoff is set at 0.5. Values surpassing 0.5 suggest potential activity. The training set comprises approved drugs, drug candidates in clinical trials, and preclinical compounds with in vivo activity. The model description features a training set of N=515, test set of N=98, sensitivity of 0.81, specificity of 0.84, accuracy of 0.83, and MCC of 0.65.                |
| Hypertension  | Evaluating potential antihypertensive activity, the cutoff is set at 0.5. Values exceeding 0.5 indicate potential activity. The training set includes approved drugs, with a model description involving a training set of N=554, test set of N=111, sensitivity of 0.89, specificity of 0.81, accuracy of 0.85, and MCC of 0.70.                                                                                                |
| Asthma        | Exploring potential activity against asthma, the cutoff is fixed at 0.5. Values exceeding 0.5 indicate potential activity. The training set involves approved drugs, drug candidates in clinical trials, and preclinical compounds with in vivo activity. The model description includes a training set of N=366, test set of N=63, sensitivity of 0.92, specificity of 0.86, accuracy of 0.89, and MCC of 0.78.                 |
| Pain          | Investigating potential analgesic activity, the cutoff is set at 0.5. Values surpassing 0.5 suggest potential activity. The training set comprises approved drugs, with a model description featuring a training set of N=525, test set of N=84, sensitivity of 0.92, specificity of 0.67, accuracy of 0.79, and MCC of 0.60.                                                                                                    |
| Skin Diseases | Assessing potential activity against skin diseases, the cutoff is established at 0.5. Values exceeding 0.5 indicate potential activity. The training set includes approved drugs, with a model description consisting of a training set of N=255, test set of N=36, sensitivity of 1.00, specificity of 0.76, accuracy of 0.86, and MCC of 0.76.                                                                                 |
| Osteoporosis  | Examining potential anti-osteoporosis activity, the cutoff is set at 0.5. Values surpassing 0.5 suggest potential activity. The training set comprises approved drugs, drug candidates in clinical trials, and preclinical compounds with in vivo activity. The model description features a training set of N=595, test set of N=86, sensitivity of 0.84, specificity of 0.85, accuracy of 0.85, and MCC of 0.70.               |
| Inflammation  | Investigating potential anti-inflammatory activity, the cutoff is set at 0.5. Values exceeding 0.5 indicate potential activity. The training set involves approved drugs, with a model description including a training set of N=598, test set of N=93, sensitivity of 0.86, specificity of 0.84, accuracy of 0.85, and MCC of 0.69.                                                                                             |
| Angina        | Assessing potential antianginal activity, the cutoff is established at 0.5. Values exceeding 0.5 indicate potential activity. The training set includes approved drugs, drug candidates in clinical trials, and preclinical compounds with in vivo activity. The model description consists of a training set of N=546, test set of N=95, sensitivity of 0.90, specificity of 0.93, accuracy of 0.92, and MCC of 0.83.           |
| Arthritis     | Exploring potential activity against arthritis, the cutoff is fixed at 0.5. Values exceeding 0.5 indicate potential activity. The training set involves approved drugs, drug candidates in clinical trials, and preclinical compounds with in vivo activity. The model description features a training set of N=460, test set of N=77, sensitivity of 0.98, specificity of 0.94, accuracy of 0.96, and MCC of 0.92.              |
| Mycosis       | Investigating potential antifungal activity, the cutoff is set at 0.5. Values surpassing 0.5 suggest potential activity. The training set comprises approved drugs, with a model description including a training set of N=172, test set of N=47, sensitivity of 0.90, specificity of 0.88, accuracy of 0.89, and MCC of 0.79.                                                                                                   |
| Schizophrenia | Assessing potential activity against schizophrenia, the cutoff is established at 0.5. Values exceeding 0.5 indicate potential activity. The training set includes approved drugs, drug candidates in clinical trials, and preclinical compounds with in vivo activity. The model description consists of a training set of N=616, test set of N=93, sensitivity of 0.89, specificity of 0.91, accuracy of 0.90, and MCC of 0.80. |

**Table S2:** MetaDrug/Metacore Parameters of Physicochemical Properties

| # | Property | Model Description                                                                                                                                                                                                                                                                                                                                                                                                                         |
|---|----------|-------------------------------------------------------------------------------------------------------------------------------------------------------------------------------------------------------------------------------------------------------------------------------------------------------------------------------------------------------------------------------------------------------------------------------------------|
| 1 | Formula  | Represents the molecular formula.                                                                                                                                                                                                                                                                                                                                                                                                         |
| 2 | HBA      | Indicates the number of hydrogen bond acceptors.                                                                                                                                                                                                                                                                                                                                                                                          |
| 3 | HBD      | Indicates the number of hydrogen bond donors.                                                                                                                                                                                                                                                                                                                                                                                             |
| 4 | MW       | Represents the molecular weight.                                                                                                                                                                                                                                                                                                                                                                                                          |
| 5 | RBN      | Indicates the number of rotatable bonds.                                                                                                                                                                                                                                                                                                                                                                                                  |
| 6 | Reactive | Identifies reactive groups within molecules. "OK" signifies that the metabolite lacks spontaneously reactive groups, while "R" indicates their presence. MetaDrug includes 89 rules to predict reactive metabolites such as quinones, aromatic and hydroxyl amines, acyl glucuronides, acyl halides, nepoxides, thiophene-S-oxides, furans, phenoxyl radicals, phenols, and aniline radicals.                                             |
| 7 | RuleOf5  | Refers to the Lipinski rule of five, which predicts the oral bioavailability of a molecule. A molecule should have no more than 5 hydrogen bond donors, no more than 10 hydrogen bond acceptors, a molecular weight below 500, and a partition coefficient (log P) under 5. Molecules compliant with these criteria are marked "OK," while non-compliant molecules are marked "Poor." Reference: Lipinski, et al., 2001 (PMID: 11259830). |

**Table S3:** MetaDrug/MetaCore parameters of ADME QSAR Models

| Property       | Model Description                                                                                                                                                                                                                                                                                                                                                                                                                                                                                     |
|----------------|-------------------------------------------------------------------------------------------------------------------------------------------------------------------------------------------------------------------------------------------------------------------------------------------------------------------------------------------------------------------------------------------------------------------------------------------------------------------------------------------------------|
| BBB, log ratio | The blood-brain barrier penetration model presents data as logarithmic values representing the ratio of metabolite concentrations in the brain to those in the plasma. A cutoff point of -0.3 is used, with higher values indicating a greater likelihood of metabolite penetration into the brain. Reference: Clarivate Analytics. Model specifications include a sample size (N) of 107, a coefficient of determination ( $R^2$ ) of 0.89, and a root mean square error (RMSE) of 0.26.             |
| G-LogP         | Lipophilicity is represented as the logarithm of the compound's octanol-water distribution coefficient. The cutoffs range from -0.4 to 5.6, with compounds having values above 5.6 considered excessively hydrophobic. Reference: Syracuse Research, PHYSPROP database. Model specifications include a sample size (N) of 13,474, a coefficient of determination ( $R^2$ ) of 0.95, and a root mean square error (RMSE) of 0.21.                                                                      |
| Prot-bind, %   | Human serum protein binding is expressed as a percentage. The cutoff point is set at 50%. Compounds with a binding percentage exceeding 95% are considered highly bound, while those below 50% are classified as low binding metabolites. Reference: Thummel and Shen, 2001, in Goodman & Gilman's The Pharmacological Basis of Therapeutics. Model specifications include a sample size (N) of 265, a coefficient of determination ( $R^2$ ) of 0.909, and a root mean square error (RMSE) of 10.11. |



|                  |                                                                                                                                                                                                                                                                                                                                                                                                                                                                                                                                                                                                                                                                                                              |
|------------------|--------------------------------------------------------------------------------------------------------------------------------------------------------------------------------------------------------------------------------------------------------------------------------------------------------------------------------------------------------------------------------------------------------------------------------------------------------------------------------------------------------------------------------------------------------------------------------------------------------------------------------------------------------------------------------------------------------------|
| Prot-bind, log t | Affinity to human serum albumin is represented by the logarithm of the retention time. A cutoff point of 0 is used, where positive values indicate higher protein binding, and negative values suggest lower protein binding. The acceptable level of binding varies depending on the project's requirements. The model is based on the retention times of compounds analyzed via HPLC using an immobilized HSA column, with retention times expressed as logarithmic values. Reference: Colmenarejo, Alvarez-Pedraglio, et al., 2001 (PMID: 11728183). Model specifications include a sample size (N) of 95, a coefficient of determination ( $R^2$ ) of 0.904, and a root mean square error (RMSE) of 0.2. |
| WSol, log mg/L   | Water solubility at 25 degrees Celsius is expressed as the logarithm of milligrams per liter (mg/L). The cutoffs range from 2 to 4, with the acceptable level of solubility varying based on the project's requirements. Reference: Syracuse Research, PHYSPROP database. Model specifications include a sample size (N) of 2,871, a coefficient of determination ( $R^2$ ) of 0.91, and a root mean square error (RMSE) of 0.54.                                                                                                                                                                                                                                                                            |

**Table S4:** MetaDrug/MetaCore Parameters of Prediction of Toxic Effects

| Property        | Model Description                                                                                                                                                                                                                                                                                                                                                                                                                                                                                                                                                                                                                       |
|-----------------|-----------------------------------------------------------------------------------------------------------------------------------------------------------------------------------------------------------------------------------------------------------------------------------------------------------------------------------------------------------------------------------------------------------------------------------------------------------------------------------------------------------------------------------------------------------------------------------------------------------------------------------------|
| AMES            | The potential for mutagenicity (AMES positive) is evaluated on a scale from 0 to 1. A score of 1 indicates AMES positivity (mutagenicity), while a score of 0 denotes AMES negativity (non-mutagenicity). The cutoff point is set at 0.5, with values closer to zero considered preferable. The AMES assay detects mutations in the histidine operon of <i>Salmonella enterica</i> sv Typhimurium. Reference: Young, Gombar, et al., 2002 (DOI: 10.1016/S0169-7439(01)00181-2). Model specifications include a sample size (N) of 1,780, a coefficient of determination ( $R^2$ ) of 0.69, and a root mean square error (RMSE) of 0.29. |
| Anemia          | The potential to cause anemia is evaluated using a cutoff point set at 0.5. Values above 0.5 indicate the potential presence of toxic compounds. The training set comprises chemicals and drugs known to induce anemia in vivo.<br><br>Model description: Training set size (N) = 324, Test set size (N) = 51, Sensitivity = 0.82, Specificity = 0.90, Accuracy = 0.86, and Matthews Correlation Coefficient (MCC) = 0.72. Reference: Clarivate Analytics.                                                                                                                                                                              |
| Carcinogenicity | The potential to induce carcinogenicity in rats and mice is assessed with a cutoff threshold set at 0.5. Values above 0.5 indicate the potential presence of hazardous compounds. The training dataset includes chemicals and drugs known to cause carcinogenic effects in vivo, utilizing mice and rats as model organisms.<br><br>Reference: ISSCAN data. Model description: Training set size (N) = 1,210, Test set size (N) = 185, Sensitivity                                                                                                                                                                                      |

|                              |                                                                                                                                                                                                                                                                                                                                                                                                                                                                                                                                                                      |
|------------------------------|----------------------------------------------------------------------------------------------------------------------------------------------------------------------------------------------------------------------------------------------------------------------------------------------------------------------------------------------------------------------------------------------------------------------------------------------------------------------------------------------------------------------------------------------------------------------|
|                              | = 0.96, Specificity = 0.90, Accuracy = 0.93, and Matthews Correlation Coefficient (MCC) = 0.86.                                                                                                                                                                                                                                                                                                                                                                                                                                                                      |
| Carcinogenicity Mouse Female | <p>The potential to induce carcinogenicity specifically in female mice is evaluated with a cutoff set at 0.5. Values above 0.5 suggest the presence of potentially harmful compounds. The training dataset includes chemicals and drugs known to elicit carcinogenic effects in vivo, exclusively using female mice as model organisms.</p> <p>Reference: ISSCAN data. Model description: Training set size (N) = 640, Test set size (N) = 94, Sensitivity = 0.90, Specificity = 0.93, Accuracy = 0.92, and Matthews Correlation Coefficient (MCC) = 0.83.</p>       |
| Carcinogenicity Mouse Male   | <p>The potential to induce carcinogenicity specifically in male mice is under evaluation with a cutoff set at 0.5. Values exceeding 0.5 indicate the potential presence of harmful compounds. The training dataset comprises chemicals and drugs known to cause carcinogenic effects in vivo, utilizing exclusively male mice as model organisms.</p> <p>Reference: ISSCAN data. Model description: Training set size (N) = 584, Test set size (N) = 93, Sensitivity = 0.91, Specificity = 0.88, Accuracy = 0.89, Matthews Correlation Coefficient (MCC) = 0.78.</p> |
| Carcinogenicity Rat Female   | <p>The potential to induce carcinogenicity specifically in female rats is under evaluation with a cutoff set at 0.5. Values exceeding 0.5 suggest the potential presence of harmful compounds. The training dataset includes chemicals and drugs known to cause carcinogenic effects in vivo, using exclusively female rats as model organisms.</p> <p>Reference: ISSCAN data. Model description: Training set size (N) = 667, Test set size (N) = 120, Sensitivity = 0.90, Specificity = 0.96, Accuracy = 0.93, Matthews Correlation Coefficient (MCC) = 0.86.</p>  |
| Carcinogenicity Rat Male     | <p>The potential to induce carcinogenicity specifically in male rats is under evaluation, with a cutoff set at 0.5. Values exceeding 0.5 suggest the potential presence of harmful compounds. The training dataset includes chemicals and drugs known to cause carcinogenic effects in vivo, using exclusively male rats as model organisms.</p> <p>Reference: ISSCAN data. Model description: Training set size (N) = 715, Test set size (N) = 117, Sensitivity = 0.92, Specificity = 0.88, Accuracy = 0.90, Matthews Correlation Coefficient (MCC) = 0.79.</p>     |
| Cardiotoxicity               | <p>The potential to induce cardiotoxicity is being assessed with a cutoff set at 0.5. Values exceeding 0.5 suggest the potential presence of toxic compounds. The training dataset comprises chemicals and drugs known to cause cardiotoxic effects in vivo across mouse, rat, and human models.</p> <p>Model description: Training set size (N) = 143, Test set size (N) = 30, Sensitivity = 0.80, Specificity = 1.00, Accuracy = 0.90, Matthews Correlation Coefficient</p>                                                                                        |

|                                   |                                                                                                                                                                                                                                                                                                                                                                                                                                                                                                                                                            |
|-----------------------------------|------------------------------------------------------------------------------------------------------------------------------------------------------------------------------------------------------------------------------------------------------------------------------------------------------------------------------------------------------------------------------------------------------------------------------------------------------------------------------------------------------------------------------------------------------------|
|                                   | (MCC) = 0.82. Reference: Clarivate Analytics.                                                                                                                                                                                                                                                                                                                                                                                                                                                                                                              |
| Cytotoxicity model, -log GI50 (M) | <p>The growth inhibition of the MCF7 cell line (human Caucasian breast adenocarcinoma) is quantified using the pGI50 metric. A cutoff of 6 is utilized, where values ranging from 6 to 8 suggest the presence of a potentially toxic metabolite. Lower values are preferred, with values less than 6 considered more desirable, and values less than 3 indicating decreased toxicity.</p> <p>Reference: DTP/NCI. Model description: Sample size (N) = 1,474, Coefficient of determination (R<sup>2</sup>) = 0.9, Root Mean Square Error (RMSE) = 0.05.</p> |
| Epididymis toxicity               | <p>The potential to induce epididymis toxicity is under evaluation with a cutoff set at 0.5. Values exceeding 0.5 indicate the potential presence of toxic compounds. The training dataset includes chemicals and drugs known to cause epididymis toxicity in vivo across mouse, rat, and human models.</p> <p>Model description: Training set size (N) = 252, Test set size (N) = 42, Sensitivity = 0.90, Specificity = 0.86, Accuracy = 0.88, Matthews Correlation Coefficient (MCC) = 0.76. Reference: Clarivate Analytics.</p>                         |
| Genotoxicity                      | <p>The potential to induce epididymis toxicity is under evaluation with a cutoff set at 0.5. Values exceeding 0.5 indicate the potential presence of toxic compounds. The training dataset includes chemicals and drugs known to cause epididymis toxicity in vivo across mouse, rat, and human models.</p> <p>Model description: Training set size (N) = 252, Test set size (N) = 42, Sensitivity = 0.90, Specificity = 0.86, Accuracy = 0.88, Matthews Correlation Coefficient (MCC) = 0.76. Reference: Clarivate Analytics.</p>                         |
| Hepatotoxicity                    | <p>The potential to induce hepatotoxicity is under evaluation with a cutoff set at 0.5. Values exceeding 0.5 suggest the potential presence of toxic compounds. The training dataset includes chemicals and drugs known to cause hepatotoxicity in vivo across mouse, rat, and human models.</p> <p>Model description: Training set size (N) = 1,380, Test set size (N) = 231, Sensitivity = 0.73, Specificity = 0.88, Accuracy = 0.81, Matthews Correlation Coefficient (MCC) = 0.62. Reference: Clarivate Analytics.</p>                                 |
| Kidney Necrosis                   | <p>The capacity to induce kidney necrosis is under assessment with a cutoff set at 0.5. Values surpassing 0.5 indicate the potential presence of toxic compounds. The training dataset includes chemicals and drugs known to induce renal necrosis in vivo across mouse, rat, and human models.</p> <p>Model description: Training set size (N) = 221, Test set size (N) = 42, Sensitivity = 0.96, Specificity = 1.00, Accuracy = 0.98, Matthews Correlation Coefficient (MCC) = 0.95. Reference: Clarivate Analytics.</p>                                 |
| Kidney Weight Gain                | The capacity to induce kidney weight gain is being assessed with a cutoff set at 0.5. Values exceeding 0.5                                                                                                                                                                                                                                                                                                                                                                                                                                                 |

|                          |                                                                                                                                                                                                                                                                                                                                                                                                                                                                                                                                                               |
|--------------------------|---------------------------------------------------------------------------------------------------------------------------------------------------------------------------------------------------------------------------------------------------------------------------------------------------------------------------------------------------------------------------------------------------------------------------------------------------------------------------------------------------------------------------------------------------------------|
|                          | <p>suggest the potential presence of compounds capable of altering kidney weight. The training dataset includes chemicals and drugs known to cause kidney weight gain in vivo across mouse and rat models.</p> <p>Model description: Training set size (N) = 240, Test set size (N) = 49, Sensitivity = 0.95, Specificity = 1.00, Accuracy = 0.98, Matthews Correlation Coefficient (MCC) = 0.96. Reference: Clarivate Analytics.</p>                                                                                                                         |
| Liver Cholestasis        | <p>The potential to induce kidney weight gain is under evaluation with a cutoff set at 0.5. Values exceeding 0.5 suggest the presence of compounds capable of altering kidney weight. The training dataset comprises chemicals and drugs known to cause kidney weight gain in vivo across mouse and rat models.</p> <p>Model details: Training set size (N) = 240, Test set size (N) = 49, Sensitivity = 0.95, Specificity = 1.00, Accuracy = 0.98, Matthews Correlation Coefficient (MCC) = 0.96. Reference: Clarivate Analytics.</p>                        |
| Liver Lipid Accumulation | <p>The potential to induce liver lipid accumulation is being assessed with a cutoff set at 0.5. Values exceeding 0.5 indicate the potential presence of compounds that may cause lipid accumulation. The training dataset includes chemicals and drugs known to induce lipid accumulation in vivo across mouse, rat, and human models.</p> <p>Model details: Training set size (N) = 172, Test set size (N) = 28, Sensitivity = 0.80, Specificity = 0.85, Accuracy = 0.82, Matthews Correlation Coefficient (MCC) = 0.64. Reference: Clarivate Analytics.</p> |
| Liver Necrosis           | <p>The capacity to induce liver necrosis is under assessment with a cutoff set at 0.5. Values exceeding 0.5 indicate the potential presence of compounds that could induce hepatic necrosis. The training dataset includes chemicals and drugs known to cause liver necrosis in vivo across mouse, rat, and human models.</p> <p>Model details: Training set size (N) = 300, Test set size (N) = 57, Sensitivity = 0.91, Specificity = 0.91, Accuracy = 0.91, Matthews Correlation Coefficient (MCC) = 0.82. Reference: Clarivate Analytics.</p>              |
| Liver Weight Gain        | <p>The capacity to induce liver weight gain is being assessed with a cutoff set at 0.5. Values exceeding 0.5 suggest the potential presence of compounds capable of altering liver weight. The training dataset includes chemicals and drugs known to cause liver weight gain in vivo across mouse and rat models.</p> <p>Model details: Training set size (N) = 292, Test set size (N) = 52, Sensitivity = 1.00, Specificity = 1.00, Accuracy = 1.00, Matthews Correlation Coefficient (MCC) = 1.00. Reference: Clarivate Analytics.</p>                     |
| MRTD                     | <p>The logarithmic Maximum Recommended Therapeutic Dose (log MRTD) is expressed in milligrams per kilogram body mass per day (mg/kg-bm/day), ranging from -5 to 3. A cutoff point of 0.5 is applied. Compounds with higher log MRTDs may be categorized as mildly toxic, whereas those with lower log MRTDs may be</p>                                                                                                                                                                                                                                        |

|                    |                                                                                                                                                                                                                                                                                                                                                                                                                                                                                                                                            |
|--------------------|--------------------------------------------------------------------------------------------------------------------------------------------------------------------------------------------------------------------------------------------------------------------------------------------------------------------------------------------------------------------------------------------------------------------------------------------------------------------------------------------------------------------------------------------|
|                    | classified as highly toxic. Reference: Matthews, Kruhlak, et al., 2004 (PMID: 16472220). Model details: Sample size (N) = 1209, Coefficient of determination ( $R^2$ ) = 0.86, Root Mean Square Error (RMSE) = 0.42.                                                                                                                                                                                                                                                                                                                       |
| Nasal pathology    | The logarithmic Maximum Recommended Therapeutic Dose (log MRTD) is expressed in milligrams per kilogram body mass per day (mg/kg-bm/day), ranging from -5 to 3. A cutoff point of 0.5 is applied. Compounds with higher log MRTDs may be categorized as mildly toxic, whereas those with lower log MRTDs may be classified as highly toxic. Reference: Matthews, Kruhlak, et al., 2004 (PMID: 16472220). Model details: Sample size (N) = 1209, Coefficient of determination ( $R^2$ ) = 0.86, Root Mean Square Error (RMSE) = 0.42.       |
| Nephron Injury     | The potential to induce nephron injury is under investigation, with a cutoff set at 0.5. Values exceeding 0.5 indicate the potential presence of toxic compounds. The training dataset includes chemicals and drugs known to cause nephron injury in vivo across mouse, rat, and human models. Model description: Training set size (N) = 598, Test set size (N) = 109, Sensitivity = 0.91, Specificity = 1.00, Accuracy = 0.96, Matthews Correlation Coefficient (MCC) = 0.93. Reference: Clarivate Analytics.                            |
| Nephrotoxicity     | The potential to induce nephrotoxicity is under evaluation, with a cutoff set at 0.5. Values exceeding 0.5 indicate the potential presence of toxic compounds. The training dataset includes chemicals and drugs known to cause nephrotoxicity in vivo across mouse, rat, and human models. Model description: Training set size (N) = 847, Test set size (N) = 154, Sensitivity = 0.90, Specificity = 0.84, Accuracy = 0.87, Matthews Correlation Coefficient (MCC) = 0.74. Reference: Clarivate Analytics.                               |
| Neurotoxicity      | The potential to induce neurotoxicity is under evaluation, with a cutoff set at 0.5. Values exceeding 0.5 suggest the potential presence of toxic compounds. The training dataset includes chemicals and drugs known to cause neurotoxicity in vivo across mouse, rat, and human models. Model description: Training set size (N) = 175, Test set size (N) = 34, Sensitivity = 0.94, Specificity = 0.94, Accuracy = 0.94, Matthews Correlation Coefficient (MCC) = 0.88. Reference: Clarivate Analytics.                                   |
| Pulmonary toxicity | The potential to induce pulmonary toxicity is under assessment. The training dataset comprises chemicals and drugs known to elicit pulmonary toxicity in vivo across mouse, rat, and human models. A cutoff threshold of 0.5 is utilized, where values surpassing 0.5 suggest the presence of potentially toxic compounds. Model description: Training set size (N) = 482, Test set size (N) = 87, Sensitivity = 0.89, Specificity = 0.88, Accuracy = 0.89, Matthews Correlation Coefficient (MCC) = 0.77. Reference: Clarivate Analytics. |
| SkinSens, EC3      | The skin sensitization potential is indicated by the effective concentration 3 (EC3), expressed as a percentage. Compounds with values greater than 10% are categorized as weak to moderate sensitizers.                                                                                                                                                                                                                                                                                                                                   |

|                     |                                                                                                                                                                                                                                                                                                                                                                                                                                                                                                                                                   |
|---------------------|---------------------------------------------------------------------------------------------------------------------------------------------------------------------------------------------------------------------------------------------------------------------------------------------------------------------------------------------------------------------------------------------------------------------------------------------------------------------------------------------------------------------------------------------------|
|                     | Reference: Ren et al. (PMID: 17723489). Model description: Sample size (N) = 89, Coefficient of determination ( $R^2$ ) = 0.67, Root Mean Square Error (RMSE) = 22.56.                                                                                                                                                                                                                                                                                                                                                                            |
| Testicular toxicity | The potential for inducing testicular toxicity is under evaluation, using a training dataset that includes chemicals and drugs known to cause testicular toxicity in vivo across mouse, rat, and human models. A cutoff value of 0.5 is applied, where values exceeding 0.5 indicate the presence of potentially toxic compounds. Model description: Training set size (N) = 439, Test set size (N) = 88, Sensitivity = 0.81, Specificity = 0.85, Accuracy = 0.83, Matthews Correlation Coefficient (MCC) = 0.66. Reference: Clarivate Analytics. |
